# Supplementary material for: Insights into the carbonate effect on water oxidation over metal oxide photocatalysts/photoanodes
Source: Royal Society of Chemistry journal article supplement (doi:10.1039/d1cp05797a), 2022-01-01
Supplement: d1cp05797a1.pdf [file d1cp05797a1.pdf]

# Insights into the carbonate effect on water oxidation over metal oxide photocatalysts/photoanodes

Hitoshi Kusama,\*<sup>a</sup> Masanori Kodera,<sup>a</sup> Koichi Yamashita<sup>b</sup> and Kazuhiro Sayama<sup>a</sup>

<sup>a</sup>*Global Zero Emission Research Center (GZR), National Institute of Advanced Industrial Science and Technology (AIST), AIST Tsukuba West, 16-1 Onogawa, Tsukuba, Ibaraki 305-8569, Japan*

<sup>b</sup>*Element Strategy Initiative for Catalysts and Batteries (ESICB), Kyoto University, Nishikyo-ku, Kyoto 615-8245, Japan*

## Supplementary information

**Table S1** Summary of the effect of carbonate on a photocatalyst and (photo)anode using TiO<sub>2</sub> and BiVO<sub>4</sub>

| Semiconductor                                                                      | TiO <sub>2</sub> | BiVO <sub>4</sub> |
|------------------------------------------------------------------------------------|------------------|-------------------|
| Photocatalytic activity for water splitting into H <sub>2</sub> and O <sub>2</sub> | Yes              | No <sup>a</sup>   |
| Improvement of photocurrent                                                        | Yes              | Yes               |
| H <sub>2</sub> O <sub>2</sub> production on photoanode                             | Yes <sup>b</sup> | Yes               |
| H <sub>2</sub> O <sub>2</sub> production on anode in the dark                      | Yes              | Yes               |

<sup>a</sup> BiVO<sub>4</sub> photocatalyst cannot evolve H<sub>2</sub> because of the positive conduction band.

<sup>b</sup> Data in this work.

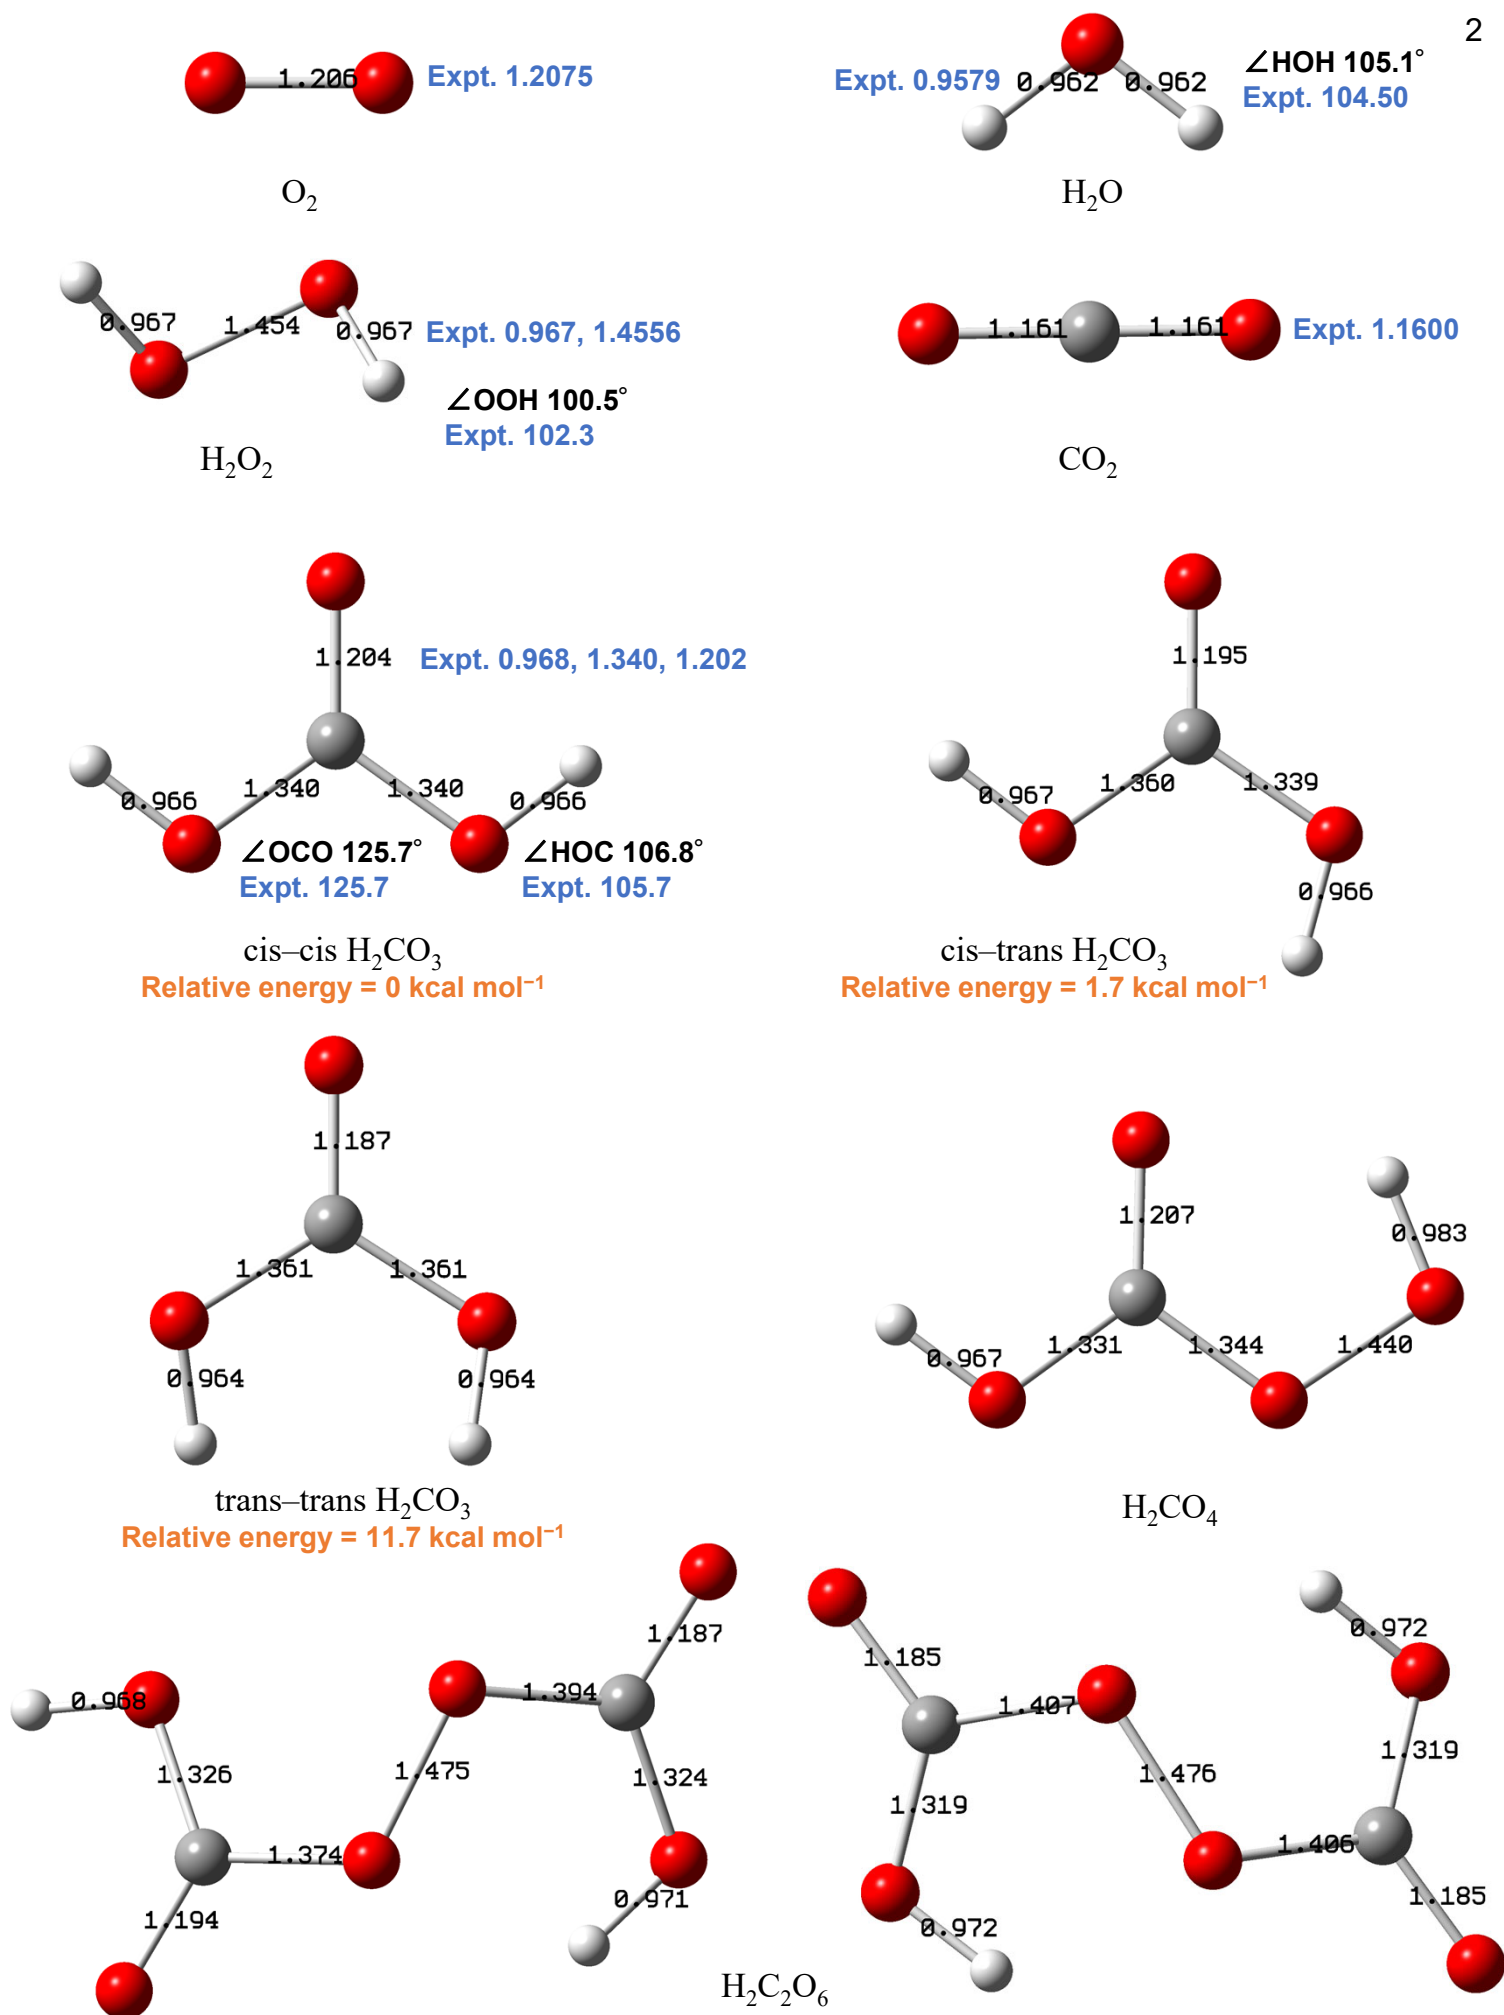

**Fig. S1** Optimized geometries (in Å) of the isolated species.<sup>S1</sup>

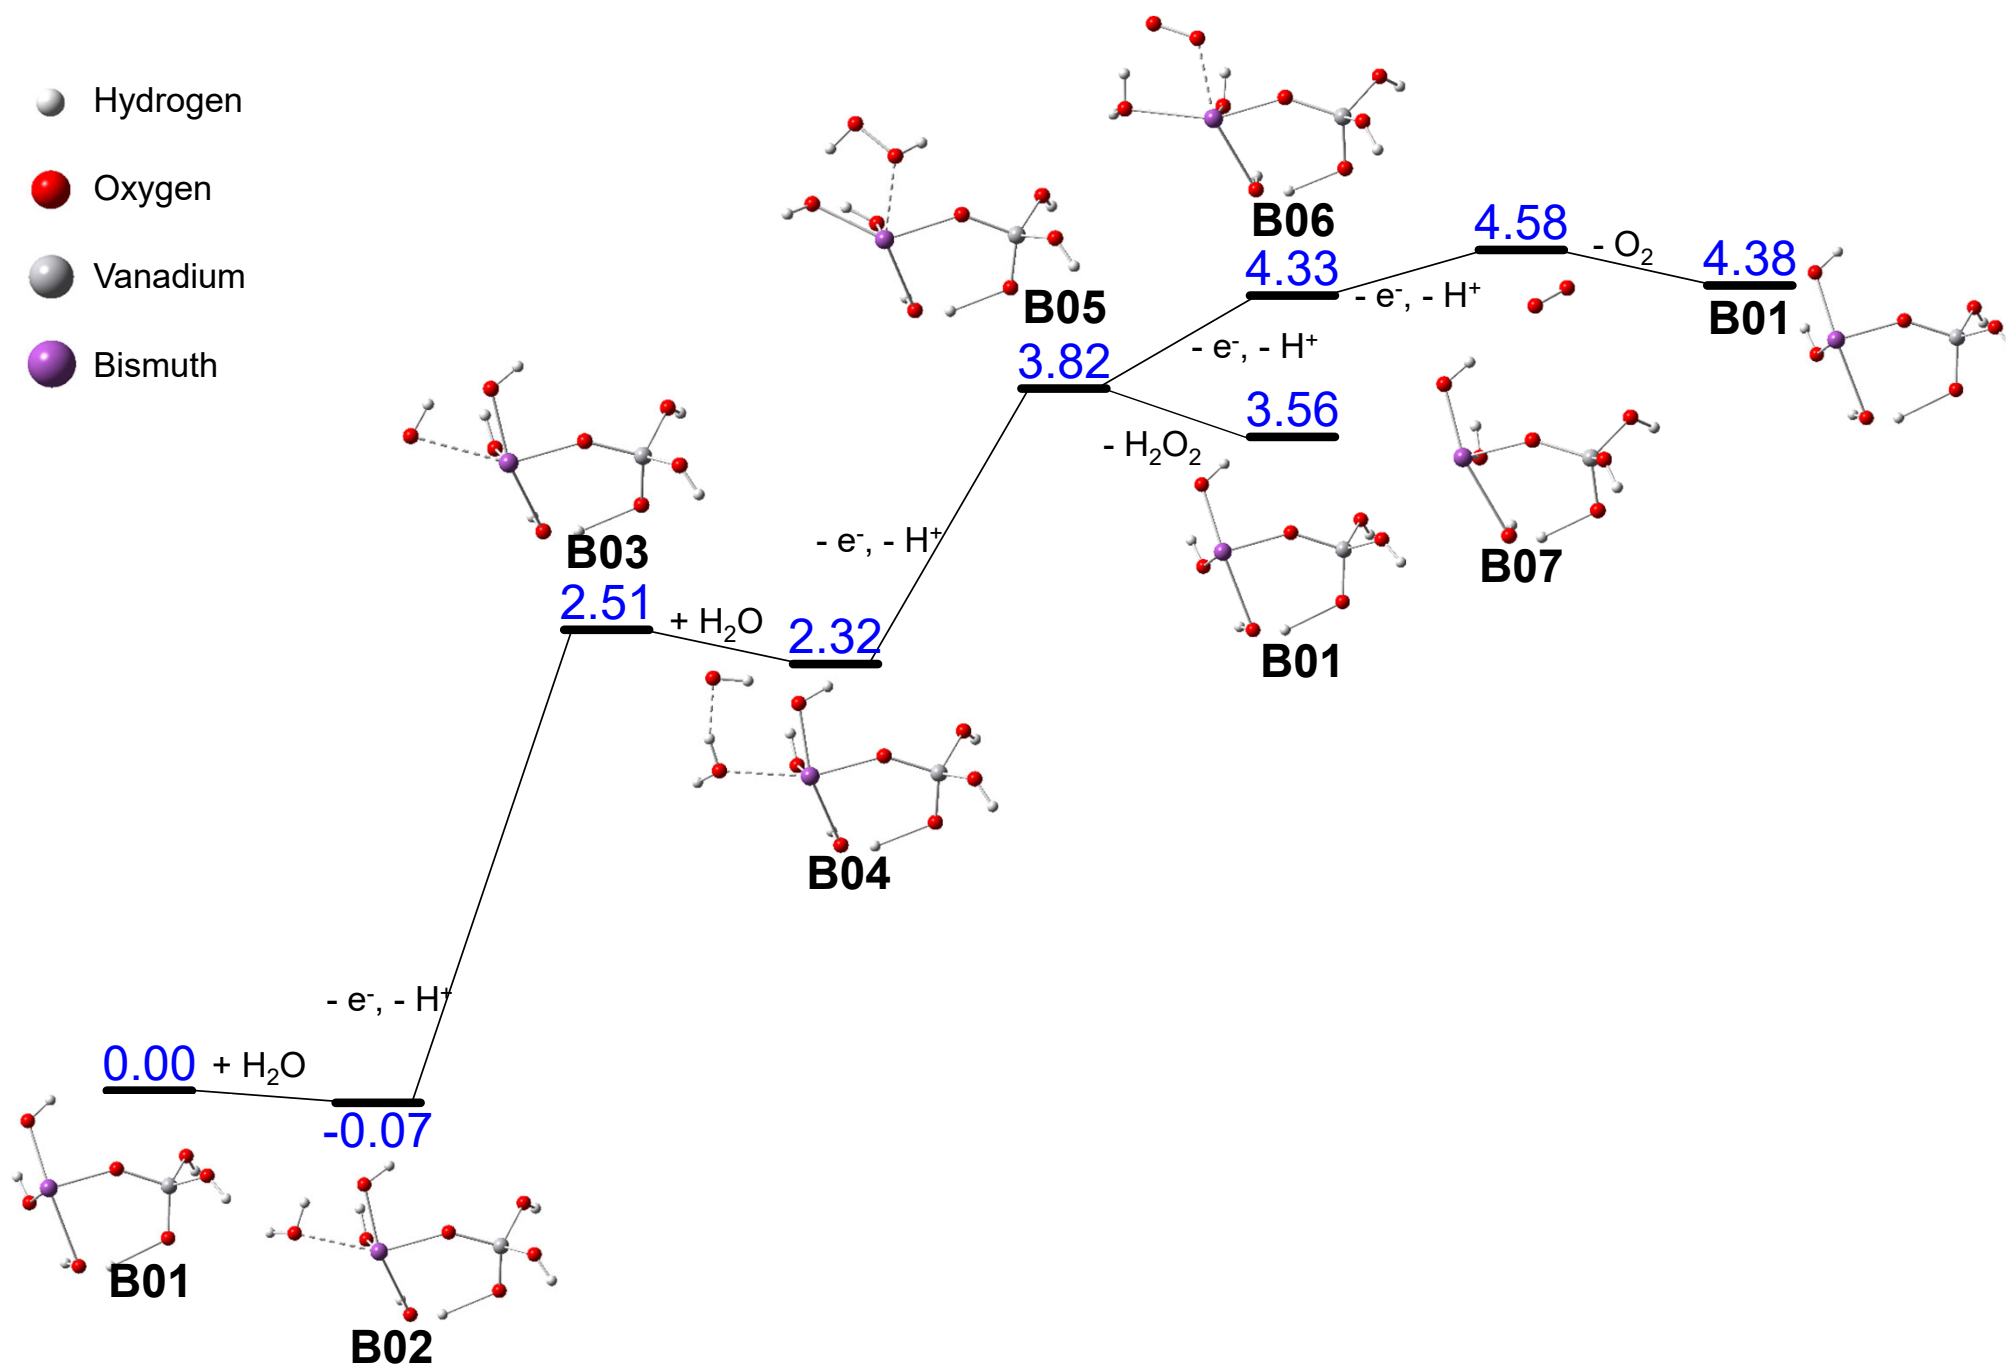

Fig. S2 Intermediate structures and free energies (in eV) of  $\text{H}_2\text{O}$  oxidation on  $\text{BiVO}_4$ .

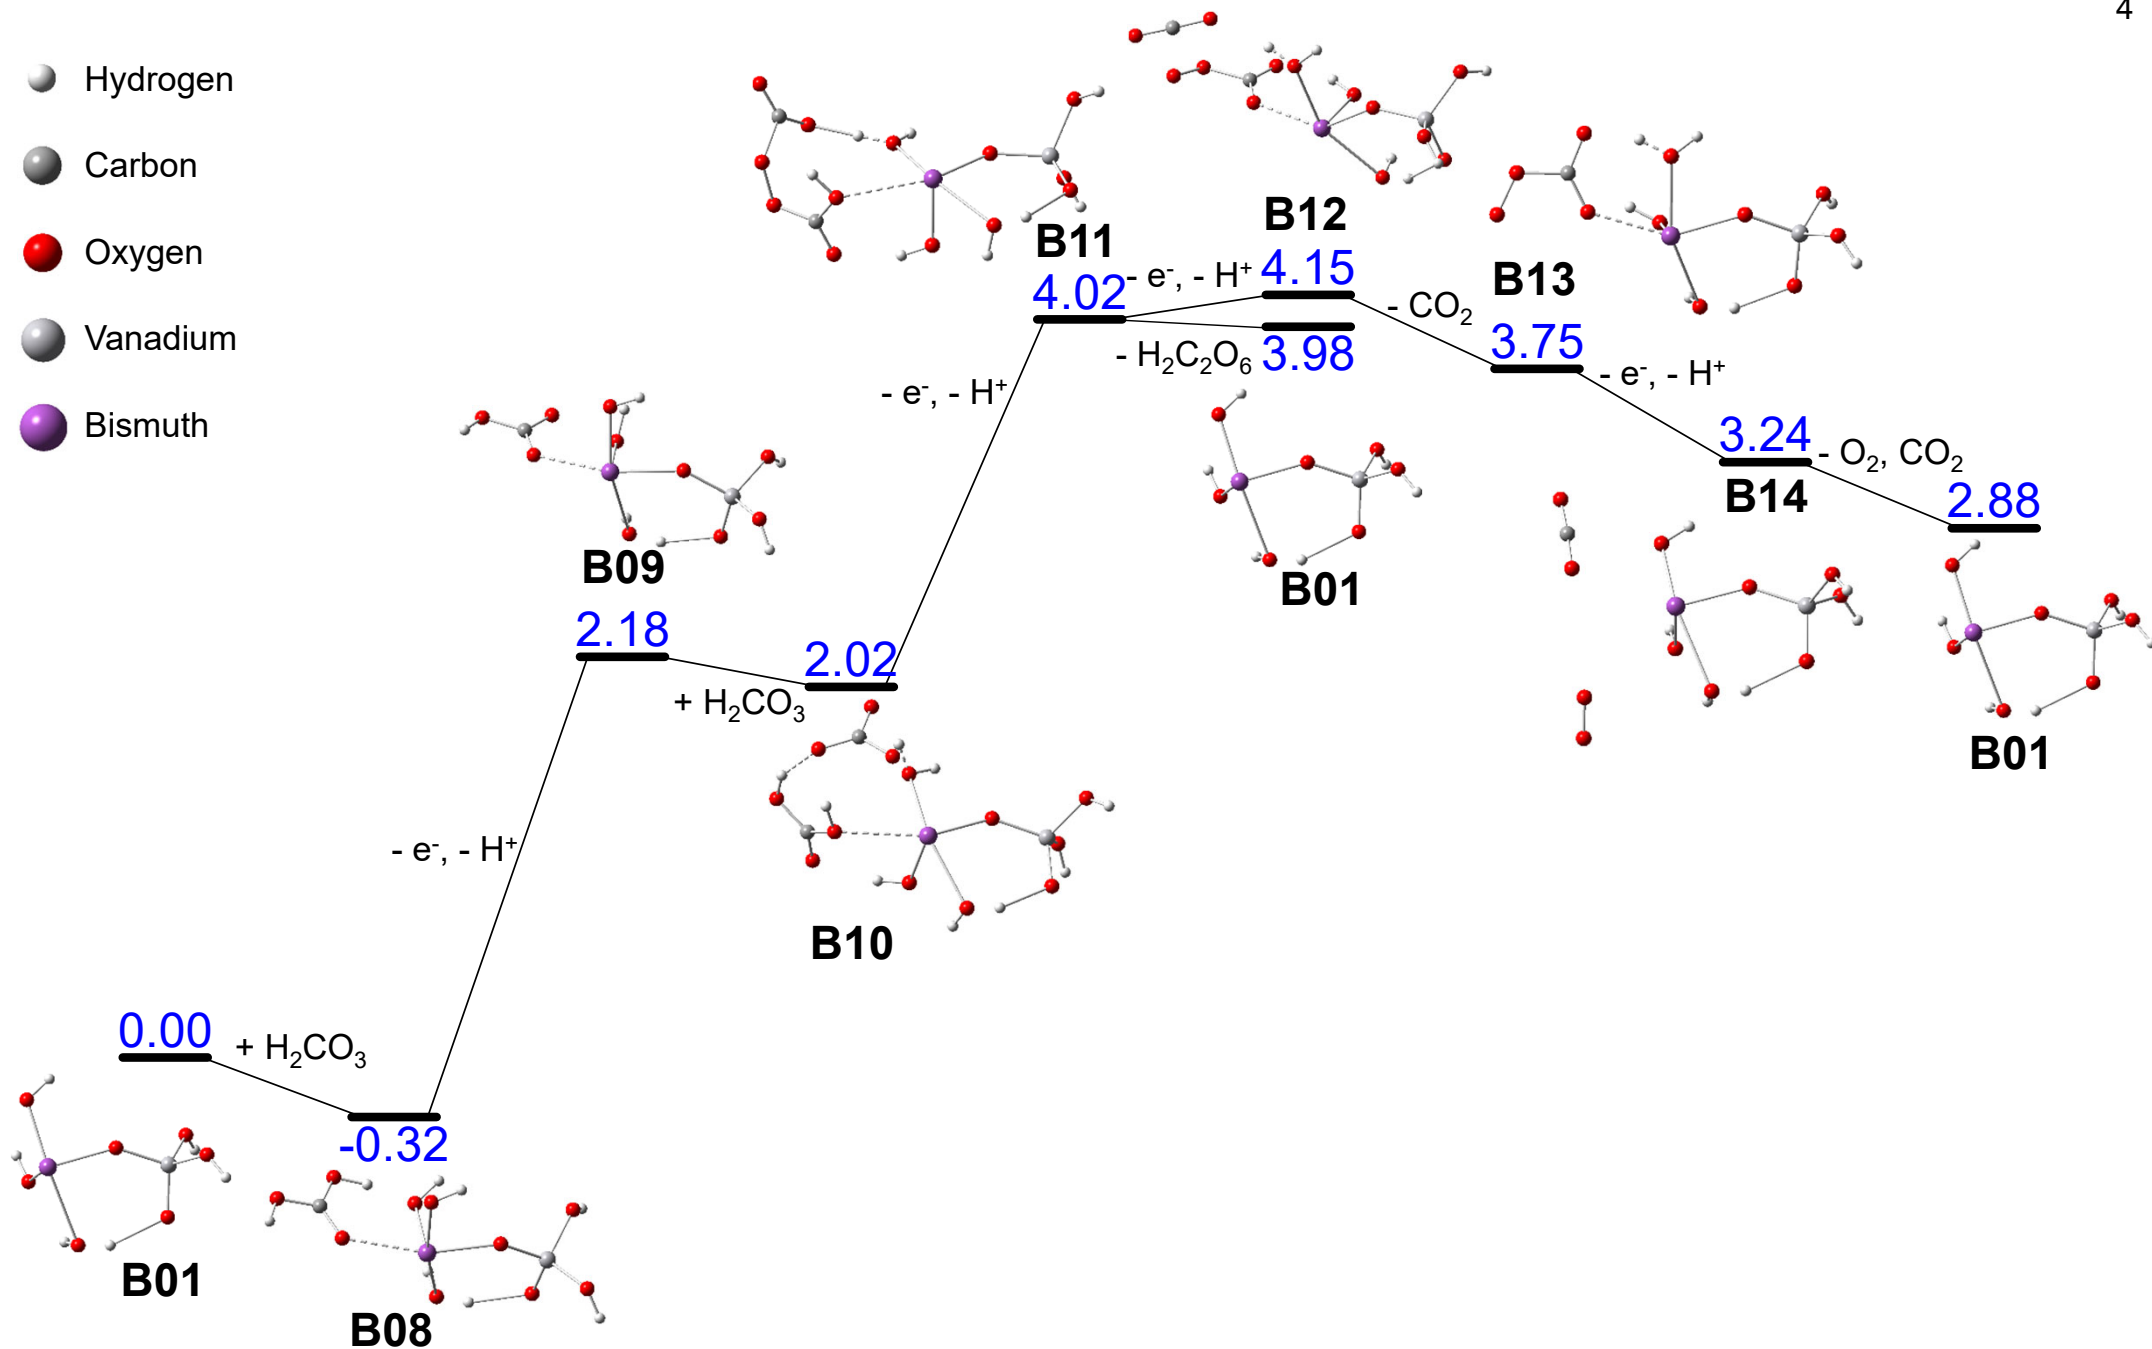

Fig. S3 Intermediate structures and free energies (in eV) of  $\text{H}_2\text{CO}_3$  oxidation on  $\text{BiVO}_4$ .

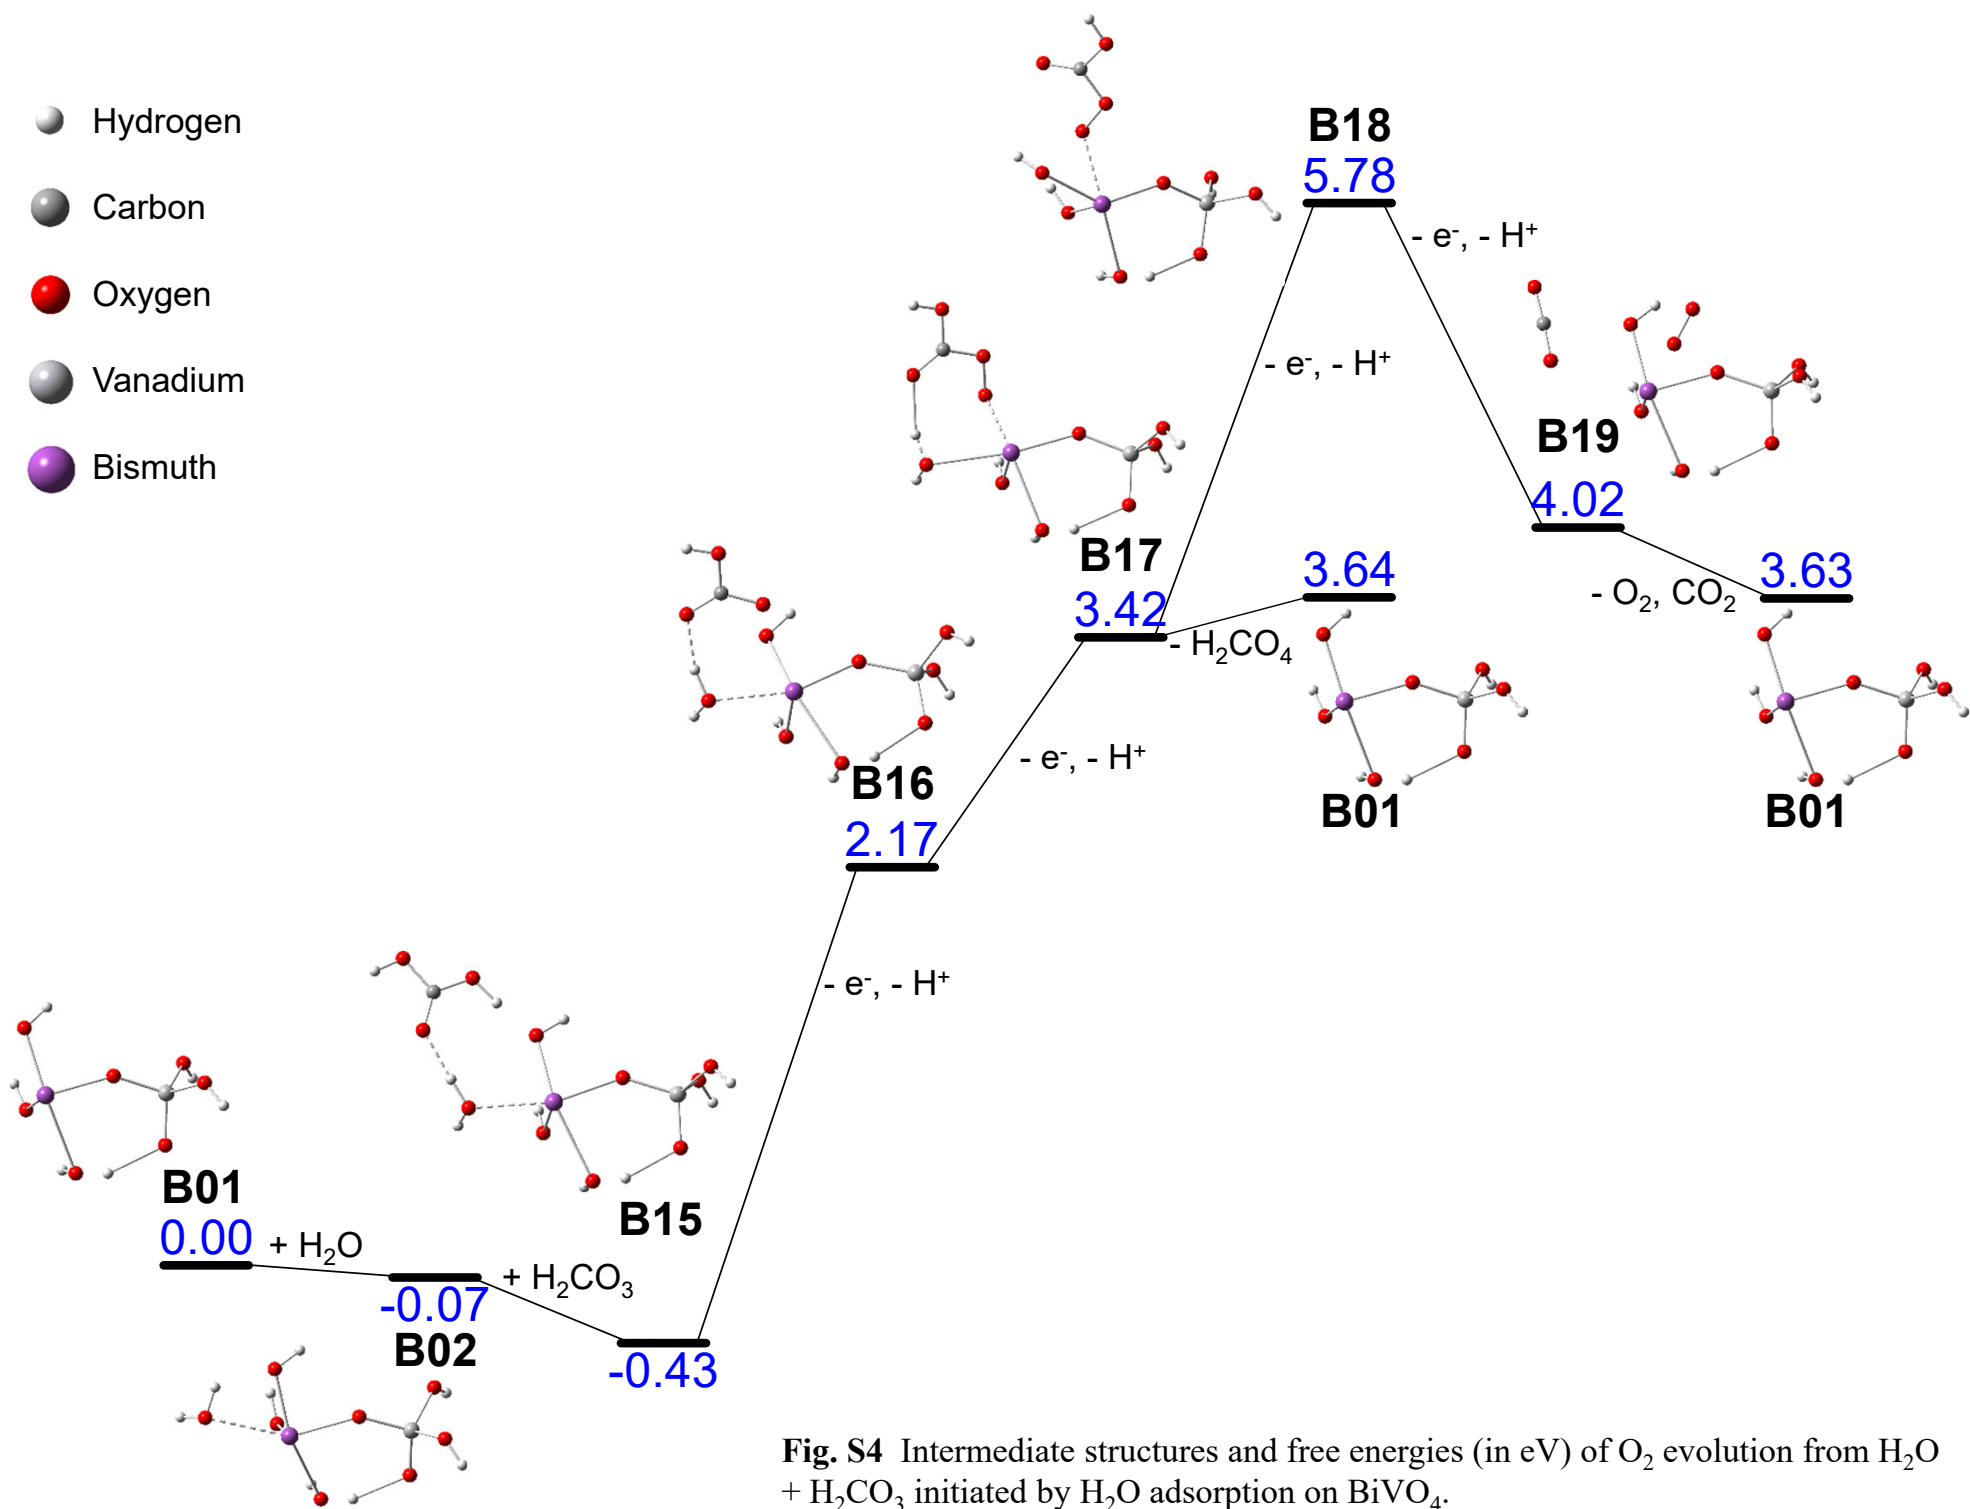

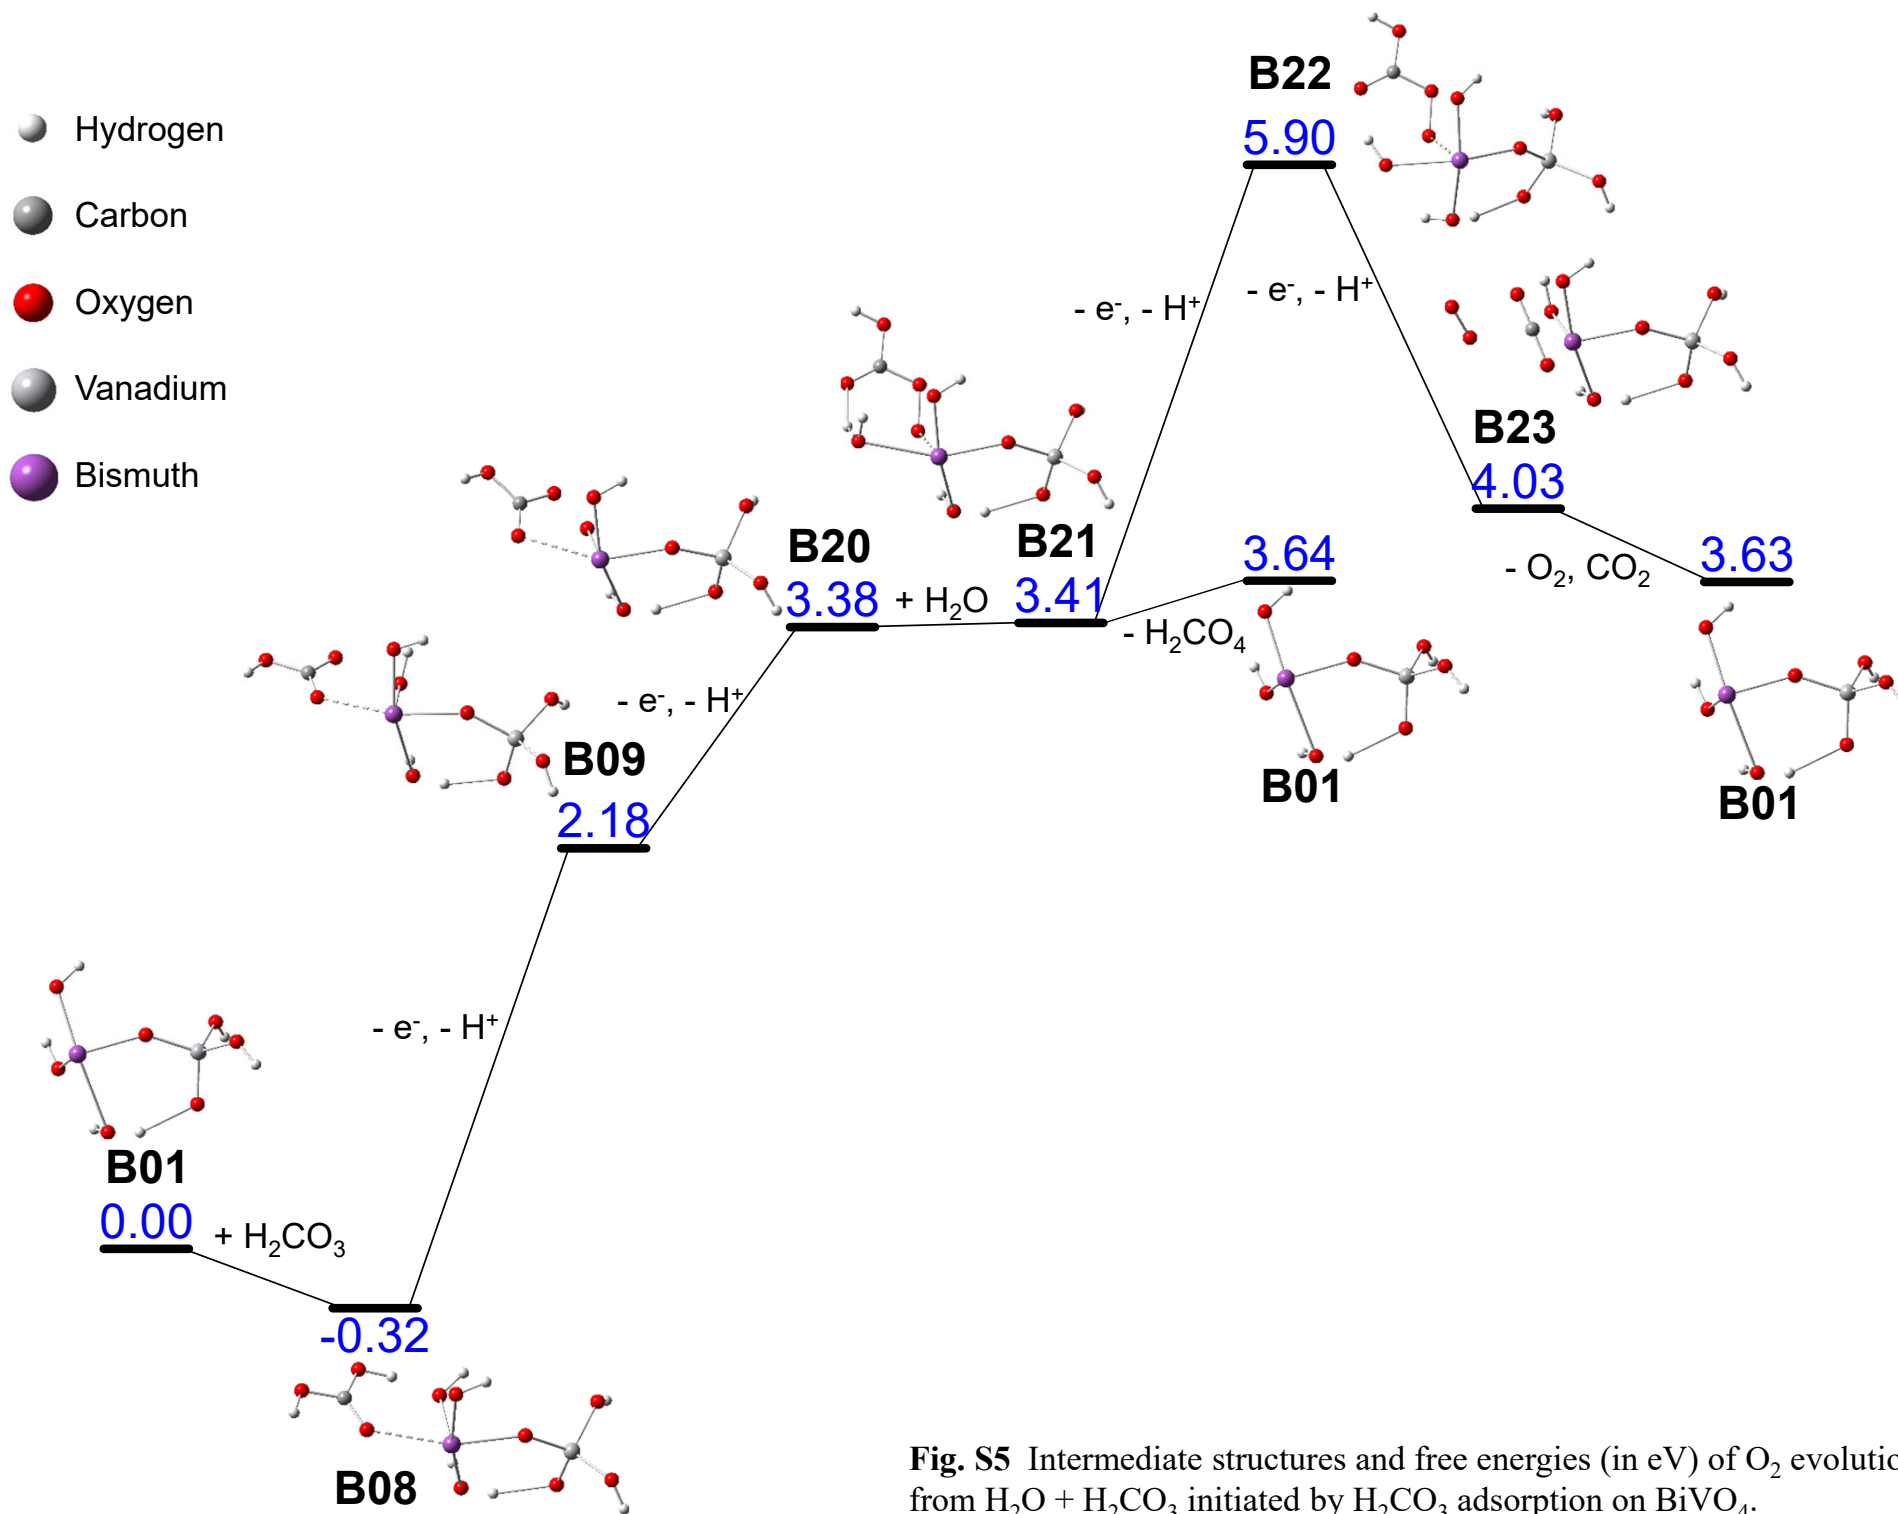

**Fig. S5** Intermediate structures and free energies (in eV) of O<sub>2</sub> evolution from H<sub>2</sub>O + H<sub>2</sub>CO<sub>3</sub> initiated by H<sub>2</sub>CO<sub>3</sub> adsorption on BiVO<sub>4</sub>.

### The elementary steps of Eq. 3

For  $\text{H}_2\text{O} \rightarrow \text{H}_2\text{CO}_3$ :

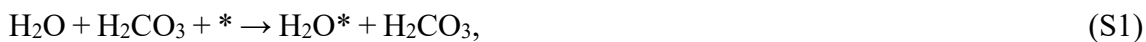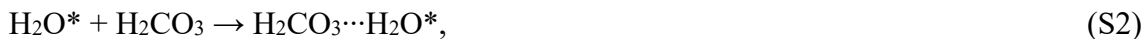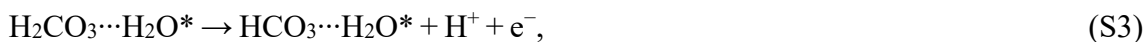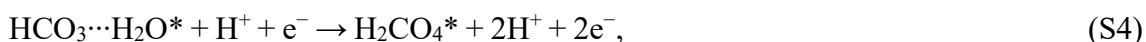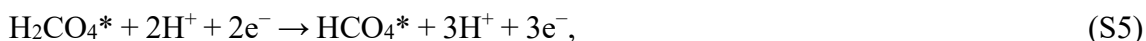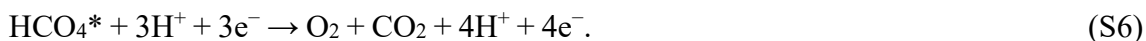

For  $\text{H}_2\text{CO}_3 \rightarrow \text{H}_2\text{O}$ :

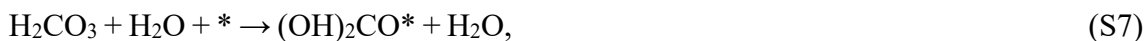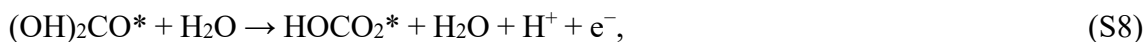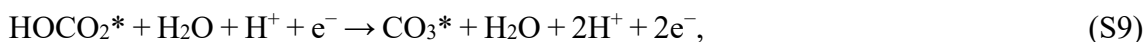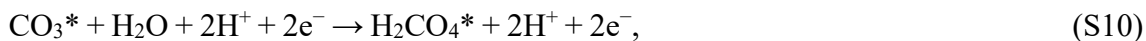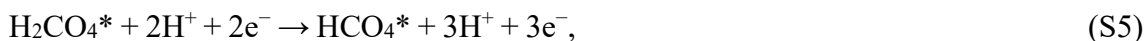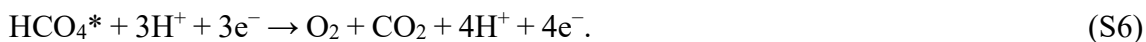

**Geometry (atomic numbers followed by the Cartesian coordinates in Å) and energy of optimized structures from cluster models**

**T01**

E = -2229.77807184 a.u.

|    |           |           |           |
|----|-----------|-----------|-----------|
| 8  | -0.061327 | -0.701802 | 0.357136  |
| 8  | 2.541859  | 0.030213  | 1.634912  |
| 8  | 1.371079  | 1.493994  | -0.712161 |
| 8  | 2.522312  | -1.272369 | -1.003583 |
| 8  | -2.653888 | 0.145759  | 1.601574  |
| 8  | -2.688858 | -1.323680 | -0.989228 |
| 8  | -1.505493 | 1.393284  | -0.857071 |
| 1  | 3.318286  | -0.363397 | 2.039209  |
| 1  | 2.023452  | 2.165327  | -0.931585 |
| 1  | 2.362972  | -1.997229 | -1.611835 |
| 1  | 2.943807  | 0.894459  | 2.127260  |
| 1  | -0.610552 | 1.764255  | -0.967045 |
| 1  | -3.426236 | -1.917018 | -0.826947 |
| 22 | 1.622676  | -0.155905 | 0.088116  |
| 22 | -1.783160 | -0.135645 | 0.042787  |

**T02**

E = -2306.25607855 a.u.

|    |           |           |           |
|----|-----------|-----------|-----------|
| 8  | 0.183380  | -0.587089 | -0.070137 |
| 8  | -2.351484 | 0.611538  | -1.492873 |
| 8  | -2.306264 | 0.212801  | 1.644058  |
| 8  | -2.391971 | -1.872886 | -0.174503 |
| 8  | 1.780521  | 1.707083  | 0.083877  |
| 8  | 2.814861  | -0.662900 | -1.493448 |
| 8  | 2.757889  | -0.809686 | 1.437381  |
| 1  | -2.924382 | 0.133886  | -2.101150 |
| 1  | -2.279435 | 1.127422  | 1.945905  |
| 1  | -2.983369 | -2.373281 | 0.393856  |
| 1  | 2.502205  | 2.331347  | 0.200272  |
| 1  | 2.498753  | -1.118223 | 2.308875  |
| 1  | 2.596390  | -0.897751 | -2.398214 |
| 22 | -1.654901 | -0.232001 | 0.002139  |
| 22 | 1.894028  | -0.159231 | -0.016133 |
| 8  | -0.920913 | 2.017525  | 0.133527  |
| 1  | 0.059058  | 2.110833  | 0.118701  |
| 1  | -1.258157 | 2.361790  | -0.703435 |

**T03 (doublet)**

E = -2305.55157657 a.u.

|   |           |           |           |
|---|-----------|-----------|-----------|
| 8 | 0.179963  | -0.832452 | -0.190083 |
| 8 | -2.192578 | 0.769906  | -1.393258 |
| 8 | -2.175124 | 0.066814  | 1.671173  |
| 8 | -2.528971 | -1.831304 | -0.336508 |
| 8 | 1.558220  | 1.722133  | -0.415899 |
| 8 | 2.861236  | -0.799305 | -1.436380 |
| 8 | 2.585737  | -0.365396 | 1.475515  |



|    |           |           |           |
|----|-----------|-----------|-----------|
| 1  | -2.842183 | 0.467824  | -2.036318 |
| 1  | -2.062527 | 0.898590  | 2.141329  |
| 1  | -3.173385 | -2.323332 | 0.178862  |
| 1  | 1.823489  | 2.405343  | 0.209249  |
| 1  | 2.320776  | -0.692845 | 2.338399  |
| 1  | 2.716125  | -1.313243 | -2.234474 |
| 22 | -1.605423 | -0.312065 | -0.018592 |
| 22 | 1.799949  | -0.127697 | -0.133775 |
| 8  | -0.589007 | 1.812037  | 0.371544  |
| 1  | -0.719148 | 2.245334  | -0.490787 |

**T04 (doublet)**

E = -2382.02603118 a.u.

|    |           |           |           |
|----|-----------|-----------|-----------|
| 8  | 0.255873  | 0.288736  | -0.330747 |
| 8  | -2.592852 | -0.831556 | -0.911174 |
| 8  | -2.275853 | 1.434812  | 1.238139  |
| 8  | -1.239196 | -1.111201 | 1.588000  |
| 8  | 2.824737  | 0.993513  | 1.017280  |
| 8  | 2.832497  | -0.984293 | -1.203394 |
| 8  | 1.496165  | -1.657401 | 1.362769  |
| 1  | -2.825622 | -1.755306 | -0.775375 |
| 1  | -2.691115 | 2.247091  | 0.933503  |
| 1  | -1.763939 | -1.116371 | 2.395493  |
| 1  | 3.141859  | 1.186094  | 1.902406  |
| 1  | 0.573514  | -1.729143 | 1.679731  |
| 1  | 3.644346  | -0.747590 | -1.657318 |
| 22 | -1.505952 | 0.124932  | 0.226693  |
| 22 | 1.899871  | -0.341714 | 0.213533  |
| 8  | -1.974413 | 1.668519  | -1.390135 |
| 1  | -2.395357 | 1.175291  | -2.115402 |
| 8  | -0.154648 | 1.635205  | -2.662658 |
| 1  | 0.185332  | 1.129431  | -1.888139 |
| 1  | -0.044357 | 2.565177  | -2.429740 |

**T05**

E = -2381.39633008 a.u.

|    |           |           |           |
|----|-----------|-----------|-----------|
| 8  | 0.175128  | 0.355660  | 0.109275  |
| 8  | -2.353356 | -0.232934 | -1.569242 |
| 8  | -2.419568 | -0.673873 | 1.493390  |
| 8  | -0.807011 | -2.277342 | -0.215961 |
| 8  | 2.756870  | 0.173170  | 1.597317  |
| 8  | 2.776406  | 1.001241  | -1.254939 |
| 8  | 1.972760  | -1.764962 | -0.536671 |
| 1  | -2.465011 | -0.849207 | -2.298917 |
| 1  | -3.010216 | -0.028708 | 1.893804  |
| 1  | -1.234303 | -3.056007 | 0.156143  |
| 1  | 3.144721  | -0.368959 | 2.287533  |
| 1  | 1.151418  | -2.289634 | -0.506420 |
| 1  | 3.460401  | 1.674661  | -1.235465 |
| 22 | -1.422265 | -0.549082 | -0.010135 |
| 22 | 1.969453  | -0.047022 | -0.014355 |

|   |           |          |           |
|---|-----------|----------|-----------|
| 8 | -2.206253 | 1.741406 | 0.083918  |
| 1 | -2.421209 | 1.891291 | -0.851412 |
| 8 | -1.177242 | 2.719594 | 0.356839  |
| 1 | -0.392896 | 2.129549 | 0.337596  |

**T06 (doublet)**

E = -2380.75378284 a.u.

|    |           |           |           |
|----|-----------|-----------|-----------|
| 8  | 0.154137  | 0.472814  | 0.036746  |
| 8  | -2.377381 | -0.410650 | -1.510013 |
| 8  | -2.467447 | -0.583519 | 1.526866  |
| 8  | -0.693006 | -2.196920 | 0.019475  |
| 8  | 2.719575  | 0.391156  | 1.561202  |
| 8  | 2.764996  | 1.079912  | -1.324373 |
| 8  | 2.003456  | -1.662453 | -0.479310 |
| 1  | -2.418210 | -0.975490 | -2.286360 |
| 1  | -3.237662 | -0.093308 | 1.827832  |
| 1  | -1.091819 | -2.950490 | 0.467333  |
| 1  | 3.124104  | -0.111381 | 2.271617  |
| 1  | 1.190312  | -2.192579 | -0.363215 |
| 1  | 3.463218  | 1.738480  | -1.342994 |
| 22 | -1.445816 | -0.503659 | 0.034528  |
| 22 | 1.959200  | 0.076805  | -0.048283 |
| 8  | -2.167563 | 1.794905  | 0.173735  |
| 8  | -1.158152 | 2.639785  | 0.153697  |
| 1  | -0.362688 | 2.014456  | 0.085902  |

**T07 (triplet)**

E = -2380.14957768 a.u.

|    |           |           |           |
|----|-----------|-----------|-----------|
| 8  | 0.050829  | 0.096041  | 0.665689  |
| 8  | -2.242278 | 1.329819  | -0.744946 |
| 8  | -2.676409 | 0.135443  | 1.912196  |
| 8  | -1.919882 | -1.642623 | -0.394636 |
| 8  | 2.370627  | -1.391662 | 1.852638  |
| 8  | 2.710089  | 0.030614  | -0.744999 |
| 8  | 0.878196  | -2.297002 | -0.572701 |
| 1  | -1.827122 | 1.930227  | -1.369844 |
| 1  | -3.307020 | 0.744604  | 2.302688  |
| 1  | -2.727769 | -2.117535 | -0.609433 |
| 1  | 2.477099  | -2.191336 | 2.372411  |
| 1  | -0.084153 | -2.421268 | -0.669378 |
| 1  | 3.582294  | 0.405516  | -0.600203 |
| 22 | -1.717369 | 0.025542  | 0.382368  |
| 22 | 1.559987  | -0.893625 | 0.315760  |
| 8  | 0.171457  | 2.968127  | -2.309487 |
| 8  | 1.116083  | 3.481109  | -1.764995 |

**T08**

E = -2494.89796053 a.u.

|   |           |           |           |
|---|-----------|-----------|-----------|
| 8 | -0.178351 | -0.402739 | 0.414778  |
| 8 | 2.506054  | 1.159161  | 0.926060  |
| 8 | 1.377590  | 0.687372  | -1.583356 |

|    |           |           |           |
|----|-----------|-----------|-----------|
| 8  | 2.455724  | -1.689030 | -0.635351 |
| 8  | -2.688488 | 1.135094  | 0.966584  |
| 8  | -2.856848 | -1.440313 | -0.523746 |
| 8  | -1.458815 | 0.882260  | -1.740238 |
| 1  | 2.612410  | 2.015684  | 0.502080  |
| 1  | 1.982179  | 0.560460  | -2.322545 |
| 1  | 2.677951  | -2.506040 | -0.180349 |
| 1  | -2.951079 | 2.057835  | 0.991405  |
| 1  | -0.521658 | 1.015350  | -1.981623 |
| 1  | -3.648037 | -1.811911 | -0.127045 |
| 22 | 1.562314  | -0.244083 | 0.011619  |
| 22 | -1.849597 | 0.037336  | -0.204493 |
| 8  | 1.989832  | -1.236672 | 2.011459  |
| 8  | 2.895170  | 0.396361  | 3.274706  |
| 8  | 2.449618  | -1.542117 | 4.181590  |
| 1  | 2.822730  | 0.885001  | 2.374738  |
| 1  | 2.060446  | -2.398562 | 3.957688  |
| 6  | 2.424064  | -0.792120 | 3.081712  |

**T09 (doublet)**

E = -2494.20222649 a.u.

|    |           |           |           |
|----|-----------|-----------|-----------|
| 8  | -0.604504 | -0.333961 | -0.343079 |
| 8  | 1.886797  | 1.138927  | 1.238683  |
| 8  | -0.371392 | 2.270993  | 0.437438  |
| 8  | 1.024771  | 1.684630  | -1.936468 |
| 8  | -2.625100 | -1.846232 | 1.272554  |
| 8  | -3.310578 | -1.044011 | -1.512579 |
| 8  | -2.899777 | 1.034003  | 0.558097  |
| 1  | 1.630917  | 1.022758  | 2.162684  |
| 1  | -0.077936 | 3.180961  | 0.552944  |
| 1  | 1.538529  | 1.307432  | -2.657249 |
| 1  | -2.934294 | -1.879403 | 2.180635  |
| 1  | -2.221510 | 1.732320  | 0.655705  |
| 1  | -3.750682 | -1.835472 | -1.831272 |
| 22 | 0.658450  | 0.917746  | -0.337306 |
| 22 | -2.405122 | -0.590734 | -0.009584 |
| 8  | 2.202423  | -0.464069 | -0.747452 |
| 8  | 3.104229  | -0.586233 | 1.317412  |
| 8  | 3.804179  | -1.942415 | -0.256645 |
| 1  | 3.596430  | -2.157549 | -1.176679 |
| 6  | 2.989594  | -0.942937 | 0.111935  |

**T10 (doublet)**

E = -2759.33630254 a.u.

|   |           |           |           |
|---|-----------|-----------|-----------|
| 8 | 0.232026  | 0.216960  | 1.105162  |
| 8 | -2.033599 | 1.866018  | -1.095232 |
| 8 | 0.645136  | 1.832132  | -0.518366 |
| 8 | -1.292750 | 2.876541  | 1.529999  |
| 8 | 2.368243  | 0.399682  | -1.793299 |
| 8 | 2.229135  | -1.450813 | 0.293638  |
| 8 | 3.251782  | 1.133339  | 0.955461  |

|    |           |           |           |
|----|-----------|-----------|-----------|
| 1  | -2.351638 | 1.276018  | -1.788369 |
| 1  | 0.702110  | 2.126608  | -1.433959 |
| 1  | -1.742970 | 3.724996  | 1.468179  |
| 1  | 2.864386  | -0.294141 | -2.239693 |
| 1  | 3.831643  | 1.869504  | 0.740891  |
| 1  | 1.680666  | -2.229308 | 0.105888  |
| 22 | -1.080617 | 1.524666  | 0.386245  |
| 22 | 1.972969  | 0.300155  | 0.002026  |
| 8  | -2.431374 | 0.200178  | 1.077325  |
| 8  | -2.252702 | -1.132133 | -0.710178 |
| 8  | -3.606637 | -1.691516 | 0.965828  |
| 1  | -3.865814 | -1.323783 | 1.821749  |
| 6  | -2.724040 | -0.853250 | 0.396755  |
| 8  | -0.025942 | -4.965321 | -1.579531 |
| 8  | 0.094550  | -3.324780 | -0.260505 |
| 8  | -1.672225 | -3.468853 | -1.684336 |
| 1  | 0.035202  | -0.508465 | 1.704966  |
| 1  | -1.960999 | -2.587413 | -1.284480 |
| 6  | -0.557102 | -3.888954 | -1.171851 |

**T11**

E = -2758.64830454 a.u.

|    |           |           |           |
|----|-----------|-----------|-----------|
| 8  | 0.325439  | -0.226771 | 0.376563  |
| 8  | 1.299148  | 1.912042  | -2.028454 |
| 8  | 2.421038  | -0.345433 | -0.813414 |
| 8  | 2.404649  | 2.099483  | 0.728997  |
| 8  | 1.425656  | -2.665579 | -1.695560 |
| 8  | -0.175403 | -2.816258 | 0.661724  |
| 8  | 2.606319  | -2.512408 | 1.099765  |
| 1  | 0.751197  | 2.063670  | -2.803343 |
| 1  | 2.736029  | -0.523578 | -1.706986 |
| 1  | 3.029935  | 2.826393  | 0.651415  |
| 1  | 0.905358  | -3.402502 | -2.031970 |
| 1  | 3.551707  | -2.433886 | 0.938657  |
| 1  | -1.060964 | -2.491501 | 0.905989  |
| 22 | 1.344218  | 1.201342  | -0.393545 |
| 22 | 1.262258  | -2.000555 | 0.002881  |
| 8  | -0.364265 | 2.393003  | 0.185758  |
| 8  | -2.066068 | 1.239583  | -0.587016 |
| 8  | -2.391674 | 2.685159  | 1.098756  |
| 1  | -1.873779 | 3.263882  | 1.678284  |
| 6  | -1.570131 | 2.118693  | 0.247661  |
| 8  | -4.345824 | -0.951825 | 0.859372  |
| 8  | -2.083918 | -0.772462 | 1.041682  |
| 8  | -3.387448 | 0.715808  | -0.196733 |
| 1  | -0.642917 | -0.311423 | 0.658460  |
| 6  | -3.247411 | -0.501778 | 0.681097  |

**T12 (doublet)**

E = -2758.03472549 a.u.

|   |           |          |           |
|---|-----------|----------|-----------|
| 8 | -0.581266 | 0.046133 | -0.977563 |
|---|-----------|----------|-----------|

|    |           |           |           |
|----|-----------|-----------|-----------|
| 8  | -0.466719 | 2.826539  | 1.363398  |
| 8  | -2.141051 | 0.824850  | 0.560561  |
| 8  | -1.266296 | 2.977351  | -1.392459 |
| 8  | -2.324069 | -1.518359 | 1.671084  |
| 8  | -0.973584 | -2.596413 | -0.541106 |
| 8  | -3.462409 | -1.333267 | -1.084413 |
| 1  | 0.035081  | 2.788987  | 2.183016  |
| 1  | -2.454091 | 0.950539  | 1.462920  |
| 1  | -1.466664 | 3.918865  | -1.370453 |
| 1  | -2.189576 | -2.387113 | 2.063217  |
| 1  | -4.383314 | -1.133051 | -0.893634 |
| 1  | -0.033097 | -2.802685 | -0.489647 |
| 22 | -0.631736 | 1.872120  | -0.146129 |
| 22 | -1.971135 | -1.162641 | -0.093679 |
| 8  | 1.324482  | 1.820397  | -0.507332 |
| 8  | 1.657739  | 0.541446  | 1.285119  |
| 8  | 3.282864  | 0.680338  | -0.398563 |
| 6  | 2.214415  | 1.043437  | -0.030895 |
| 8  | 4.388857  | -2.560268 | -0.037322 |
| 8  | 2.149477  | -2.355197 | -0.612218 |
| 8  | 2.371541  | -0.400209 | 1.854635  |
| 1  | 0.068383  | -0.266422 | -1.614853 |
| 6  | 3.274171  | -2.440013 | -0.316496 |

**T13 (doublet)**

E = -2569.38279566 a.u.

|    |           |           |           |
|----|-----------|-----------|-----------|
| 8  | -0.514774 | -0.576581 | -0.760259 |
| 8  | -0.788119 | 2.057843  | 1.575880  |
| 8  | -2.318552 | 0.013238  | 0.637522  |
| 8  | -1.793156 | 2.285237  | -1.182542 |
| 8  | -2.191832 | -2.388516 | 1.641816  |
| 8  | -0.882685 | -3.302737 | -0.658988 |
| 8  | -3.359166 | -2.051631 | -1.128845 |
| 1  | 0.008192  | 2.440725  | 1.970526  |
| 1  | -2.588638 | 0.040314  | 1.562946  |
| 1  | -2.141619 | 3.181678  | -1.165962 |
| 1  | -2.077114 | -3.281663 | 1.981237  |
| 1  | -4.227896 | -1.662083 | -0.988331 |
| 1  | -0.025240 | -3.727763 | -0.589593 |
| 22 | -0.927724 | 1.248479  | -0.015597 |
| 22 | -1.887106 | -1.913822 | -0.102255 |
| 8  | 0.946215  | 1.594832  | -0.480371 |
| 8  | 1.981656  | 2.631023  | 1.204715  |
| 8  | 3.137848  | 2.075707  | -0.745812 |
| 6  | 2.101639  | 2.050266  | -0.171689 |
| 8  | 3.101633  | 3.136433  | 1.674583  |
| 1  | 0.235308  | -0.756222 | -1.335664 |

**T14 (triplet)**

E = -2568.79932966 a.u.

|   |          |           |           |
|---|----------|-----------|-----------|
| 8 | 1.081732 | -0.654624 | -0.610350 |
|---|----------|-----------|-----------|

|    |           |           |           |
|----|-----------|-----------|-----------|
| 8  | -0.771674 | 1.637810  | -1.161566 |
| 8  | 0.212738  | 0.936529  | 1.557532  |
| 8  | -1.814816 | -0.777424 | 0.249448  |
| 8  | 2.905563  | -0.004753 | 1.424698  |
| 8  | 3.990363  | -0.485736 | -1.346347 |
| 8  | 3.048341  | -2.763164 | 0.228438  |
| 1  | -0.741524 | 2.597632  | -1.131786 |
| 1  | 1.147248  | 0.820032  | 1.815938  |
| 1  | -2.674404 | -0.901167 | -0.165263 |
| 1  | 3.666834  | 0.082158  | 2.005756  |
| 1  | 2.519070  | -3.496050 | 0.552172  |
| 1  | 4.043323  | 0.157601  | -2.056814 |
| 22 | -0.384446 | 0.297085  | -0.011263 |
| 22 | 2.761570  | -1.012121 | -0.127397 |
| 8  | -4.679422 | -1.510615 | -0.633629 |
| 8  | -0.471499 | 4.803438  | -0.237821 |
| 8  | -6.441685 | -2.771032 | 0.198597  |
| 6  | -5.560750 | -2.142690 | -0.214298 |
| 8  | -0.245898 | 5.159018  | 0.891375  |

**T15**

E = -2571.37924172 a.u.

|    |           |           |           |
|----|-----------|-----------|-----------|
| 8  | -1.517831 | 0.526137  | -0.308514 |
| 8  | 1.582707  | 1.188796  | -0.930188 |
| 8  | 0.070637  | 2.366390  | 1.674341  |
| 8  | -0.393582 | 3.079419  | -0.892854 |
| 8  | -1.426877 | -1.980387 | 0.898440  |
| 8  | -2.855767 | -1.737550 | -1.752848 |
| 8  | -4.114886 | -0.631352 | 0.648833  |
| 1  | 1.752743  | 1.859797  | -1.602804 |
| 1  | 0.339952  | 1.829797  | 2.428624  |
| 1  | -0.474582 | 3.991124  | -0.599509 |
| 1  | -1.593451 | -2.852548 | 1.266326  |
| 1  | -4.472683 | 0.008886  | 1.268440  |
| 1  | -2.428464 | -1.796227 | -2.610578 |
| 22 | -0.019565 | 1.570674  | 0.037514  |
| 22 | -2.528959 | -0.924146 | -0.170343 |
| 8  | 0.654704  | -0.220205 | 1.193802  |
| 1  | 0.031477  | -0.979064 | 1.195500  |
| 1  | 1.570253  | -0.576438 | 1.114673  |
| 8  | 3.137665  | -1.247204 | 0.919572  |
| 8  | 3.638994  | -0.360782 | -1.101435 |
| 8  | 4.982736  | -1.830437 | -0.219345 |
| 1  | 2.802018  | 0.197831  | -0.978554 |
| 1  | 5.076220  | -2.381782 | 0.568685  |
| 6  | 3.847434  | -1.132650 | -0.072542 |

**T16 (doublet)**

E = -2570.67659787 a.u.

|   |           |          |          |
|---|-----------|----------|----------|
| 8 | 1.254498  | 0.433927 | 0.371429 |
| 8 | -1.850352 | 1.396299 | 0.328234 |

|    |           |           |           |
|----|-----------|-----------|-----------|
| 8  | 0.348888  | 2.497094  | -1.766787 |
| 8  | 0.266539  | 3.053757  | 0.899823  |
| 8  | 1.300737  | -1.839720 | -1.247745 |
| 8  | 2.094667  | -2.142129 | 1.651709  |
| 8  | 3.930604  | -0.806554 | -0.196897 |
| 1  | -2.169643 | 1.860529  | 1.110681  |
| 1  | 0.074405  | 2.082568  | -2.593040 |
| 1  | 0.367588  | 3.994278  | 0.730172  |
| 1  | 1.514505  | -2.646467 | -1.724697 |
| 1  | 4.457157  | -0.116492 | -0.607519 |
| 1  | 1.471179  | -2.282955 | 2.368470  |
| 22 | -0.023600 | 1.647176  | -0.201791 |
| 22 | 2.186369  | -1.068657 | 0.199028  |
| 8  | -0.696900 | 0.023167  | -1.582862 |
| 1  | -0.075637 | -0.735237 | -1.635048 |
| 1  | -1.580178 | -0.345820 | -1.346350 |
| 8  | -2.996649 | -1.151464 | -0.761503 |
| 8  | -2.800243 | -0.340207 | 1.336750  |
| 8  | -4.216266 | -1.946035 | 0.960158  |
| 1  | -4.502168 | -2.542058 | 0.252996  |
| 6  | -3.295813 | -1.120664 | 0.422614  |

**T17**

E = -2570.03452499 a.u.

|    |           |           |           |
|----|-----------|-----------|-----------|
| 8  | 0.951114  | 0.134321  | 0.432327  |
| 8  | -2.137023 | 1.292106  | -0.159428 |
| 8  | 0.365000  | 2.729565  | -1.211169 |
| 8  | -0.186423 | 2.446017  | 1.513005  |
| 8  | 1.547615  | -1.630866 | -1.644599 |
| 8  | 1.993758  | -2.573912 | 1.194599  |
| 8  | 3.826844  | -0.605716 | 0.034511  |
| 1  | 0.377924  | 2.457870  | -2.137844 |
| 1  | -0.761935 | 3.100200  | 1.918032  |
| 1  | 1.932004  | -2.274664 | -2.246222 |
| 1  | 4.294978  | 0.220388  | -0.108733 |
| 1  | 1.377278  | -2.931773 | 1.837104  |
| 22 | -0.224373 | 1.499390  | -0.016663 |
| 22 | 2.108450  | -1.162492 | 0.070565  |
| 8  | -0.470416 | 0.216381  | -1.938347 |
| 1  | 0.179910  | -0.513004 | -2.032198 |
| 1  | -1.355325 | -0.188202 | -1.889150 |
| 8  | -2.848469 | -1.079507 | -0.977887 |
| 8  | -2.681630 | 0.365890  | 0.788928  |
| 8  | -3.746143 | -1.491244 | 1.060092  |
| 1  | -3.991933 | -2.318117 | 0.623225  |
| 6  | -3.071358 | -0.761500 | 0.163541  |

**T18 (doublet)**

E = -2569.38488142 a.u.

|   |           |           |           |
|---|-----------|-----------|-----------|
| 8 | -1.542202 | -0.133760 | 0.029775  |
| 8 | 4.847732  | 1.408759  | -0.464362 |

|    |           |           |           |
|----|-----------|-----------|-----------|
| 8  | -2.587193 | 2.232015  | 1.547685  |
| 8  | -2.576545 | 2.255761  | -1.417208 |
| 8  | -2.223690 | -2.902111 | 0.746522  |
| 8  | 0.601822  | -2.018740 | 0.916525  |
| 8  | -0.713968 | -2.291952 | -1.750864 |
| 1  | -2.339346 | 2.678401  | 2.360962  |
| 1  | -2.375061 | 2.843885  | -2.148877 |
| 1  | -2.822022 | -3.626160 | 0.548957  |
| 1  | -0.816984 | -1.926352 | -2.632878 |
| 1  | 0.615074  | -2.535494 | 1.730100  |
| 22 | -1.686404 | 1.711241  | 0.064937  |
| 22 | -1.018696 | -1.825917 | -0.042898 |
| 8  | -0.034545 | 2.355441  | 0.080280  |
| 1  | 0.863921  | 1.991616  | 0.015264  |
| 8  | 2.333334  | 0.823880  | -0.126387 |
| 8  | 4.553673  | 0.180220  | -0.083734 |
| 8  | 3.014451  | -1.268542 | 0.440807  |
| 1  | 2.039417  | -1.520471 | 0.594632  |
| 6  | 3.142755  | -0.033028 | 0.073069  |

**T19 (triplet)**

E = -2568.80016937 a.u.

|    |           |           |           |
|----|-----------|-----------|-----------|
| 8  | -1.718613 | 0.004997  | -0.033033 |
| 8  | 7.058296  | -0.399610 | -0.034209 |
| 8  | -2.396899 | -2.457990 | -1.536969 |
| 8  | -2.755338 | -2.389297 | 1.401724  |
| 8  | -2.178842 | 2.595187  | -1.436220 |
| 8  | 0.378705  | 2.038736  | -0.021745 |
| 8  | -2.153056 | 2.500799  | 1.490219  |
| 1  | -2.085464 | -3.004002 | -2.262187 |
| 1  | -3.586756 | -2.867668 | 1.445692  |
| 1  | -2.916427 | 3.191258  | -1.583672 |
| 1  | -2.566671 | 2.226103  | 2.311191  |
| 22 | -1.729124 | -1.818637 | 0.015828  |
| 22 | -1.436860 | 1.779896  | 0.000216  |
| 8  | -0.038505 | -2.377501 | 0.258278  |
| 1  | 0.817395  | -1.940973 | 0.177699  |
| 8  | 2.369242  | -0.529711 | -0.054411 |
| 8  | 5.949930  | -0.873851 | -0.042063 |
| 8  | 3.364245  | 1.566425  | -0.042566 |
| 1  | 0.864817  | 2.867337  | -0.069466 |
| 6  | 2.845538  | 0.530229  | -0.047281 |

**T20**

E = -2493.56489772 a.u.

|   |           |           |           |
|---|-----------|-----------|-----------|
| 8 | 0.693336  | -0.344595 | 0.544477  |
| 8 | -2.023551 | 0.689886  | -1.150649 |
| 8 | 0.094289  | 2.025142  | -0.675481 |
| 8 | -1.218538 | 1.586678  | 1.875784  |
| 8 | 2.674337  | -1.932225 | -1.047893 |
| 8 | 3.551982  | -0.640749 | 1.493323  |



|    |           |           |           |
|----|-----------|-----------|-----------|
| 8  | 2.737971  | 1.043022  | -0.804180 |
| 1  | -0.381745 | 2.689916  | -1.184976 |
| 1  | -0.767828 | 2.142278  | 2.516744  |
| 1  | 2.859870  | -2.070990 | -1.979381 |
| 1  | 1.974924  | 1.629973  | -0.977373 |
| 1  | 4.078597  | -1.347712 | 1.873659  |
| 22 | -0.724969 | 0.727755  | 0.363446  |
| 22 | 2.459628  | -0.508503 | 0.049345  |
| 8  | -2.117886 | -0.863491 | 0.792990  |
| 8  | -3.157147 | -0.199276 | -1.069373 |
| 8  | -4.040962 | -1.821475 | 0.092684  |
| 1  | -3.904953 | -2.336086 | 0.901214  |
| 6  | -3.047292 | -0.956356 | -0.010288 |

**T21**

E = -2570.02968911 a.u.

|    |           |           |           |
|----|-----------|-----------|-----------|
| 8  | 1.228343  | 0.370676  | -0.339821 |
| 8  | -1.678972 | -0.705204 | -0.737192 |
| 8  | -0.957012 | 1.939347  | -1.291276 |
| 8  | -0.910628 | 1.677660  | 1.452835  |
| 8  | 3.239195  | -1.526625 | -1.303868 |
| 8  | 3.400388  | -0.543181 | 1.482368  |
| 8  | 4.024329  | 1.288471  | -0.712867 |
| 1  | -1.566624 | 1.964806  | -2.032770 |
| 1  | -1.123696 | 2.613215  | 1.371680  |
| 1  | 3.844930  | -1.799091 | -1.996140 |
| 1  | 3.925807  | 2.098203  | -1.218880 |
| 1  | 3.312580  | -1.376058 | 1.953669  |
| 22 | -0.521522 | 0.687631  | -0.055161 |
| 22 | 2.978900  | -0.100079 | -0.226200 |
| 8  | -3.108452 | -1.702403 | 1.218052  |
| 8  | -3.077521 | -0.402889 | -0.664920 |
| 8  | -4.977499 | -0.897183 | 0.228259  |
| 1  | -5.389889 | -1.335363 | 0.985198  |
| 6  | -3.656647 | -1.071950 | 0.346433  |
| 8  | -0.441804 | -0.892672 | 1.611903  |
| 1  | -0.450934 | -0.412828 | 2.449469  |
| 1  | -1.282518 | -1.389083 | 1.559298  |

**T22 (doublet)**

E = -2569.36414462 a.u.

|   |           |           |           |
|---|-----------|-----------|-----------|
| 8 | 1.428286  | 0.026750  | 0.383450  |
| 8 | -3.251008 | 1.326123  | -1.757874 |
| 8 | -0.654954 | 1.972437  | -0.237056 |
| 8 | -0.647861 | 0.681452  | 2.436722  |
| 8 | 3.235002  | -1.779352 | -1.019779 |
| 8 | 4.087991  | -0.610874 | 1.571957  |
| 8 | 3.932983  | 1.107536  | -0.787819 |
| 1 | -1.388144 | 2.269743  | -0.787368 |
| 1 | -0.741816 | 1.433943  | 3.025325  |
| 1 | 3.733797  | -2.053019 | -1.792805 |

|    |           |           |           |
|----|-----------|-----------|-----------|
| 1  | 3.634333  | 1.891105  | -1.255378 |
| 1  | 4.233575  | -1.379789 | 2.128145  |
| 22 | -0.306747 | 0.453870  | 0.673696  |
| 22 | 3.175264  | -0.307780 | 0.036003  |
| 8  | -4.054112 | -1.173373 | -1.592262 |
| 8  | -3.822370 | 0.933145  | -0.637855 |
| 8  | -4.714505 | -0.666518 | 0.529581  |
| 1  | -4.929940 | -1.607553 | 0.597738  |
| 6  | -4.190374 | -0.449801 | -0.666224 |
| 8  | -1.390037 | -0.884991 | 0.069342  |
| 1  | -1.230745 | -1.503855 | -0.650522 |

**T23 (triplet)**

E = -2568.80066092 a.u.

|    |           |           |           |
|----|-----------|-----------|-----------|
| 8  | 1.092625  | -0.386279 | -0.057233 |
| 8  | -3.511233 | -2.691111 | 2.684630  |
| 8  | -0.480183 | -2.422389 | 1.385944  |
| 8  | 0.350858  | -2.944039 | -1.415042 |
| 8  | 1.094491  | 2.490636  | -0.346497 |
| 8  | 3.483447  | 0.955174  | -1.256082 |
| 8  | 2.987438  | 1.234482  | 1.594612  |
| 1  | -1.251567 | -2.587326 | 1.934605  |
| 1  | 0.695241  | -3.835407 | -1.320525 |
| 1  | 1.354701  | 3.412281  | -0.437685 |
| 1  | 2.789618  | 1.037948  | 2.512932  |
| 1  | 3.581287  | 0.600312  | -2.142663 |
| 22 | -0.188876 | -1.676950 | -0.234572 |
| 22 | 2.175238  | 1.044173  | -0.010317 |
| 8  | -1.258639 | 4.260536  | -1.021411 |
| 8  | -4.524894 | -2.331341 | 2.141042  |
| 8  | -2.100811 | 2.111519  | -0.783214 |
| 6  | -1.655040 | 3.178866  | -0.898749 |
| 8  | -1.689664 | -0.907810 | -0.856592 |
| 1  | -1.987993 | 0.008912  | -0.883260 |

**B01**

E = -1480.02827234 a.u.

|    |           |           |           |
|----|-----------|-----------|-----------|
| 8  | 0.714540  | -0.057648 | -0.453586 |
| 8  | 3.205837  | -0.619224 | 0.852530  |
| 8  | 2.121792  | 1.914688  | 0.738243  |
| 8  | 3.138066  | 0.925340  | -1.625657 |
| 8  | -1.592446 | -0.131753 | 1.822234  |
| 8  | -0.644381 | 2.282024  | 1.179098  |
| 1  | 3.584011  | -0.414148 | 1.713928  |
| 1  | 0.319704  | 2.425993  | 1.159499  |
| 1  | 3.531131  | 1.784882  | -1.809581 |
| 1  | -0.829147 | 1.840454  | 2.023013  |
| 1  | -1.742858 | -1.062892 | 2.025382  |
| 23 | 2.278481  | 0.568700  | -0.102329 |
| 83 | -1.408743 | 0.202258  | -0.253847 |
| 8  | -1.733187 | -1.835716 | -0.708332 |

1        -0.937540    -2.376685    -0.767532

**B02**

E = -1556.50748680 a.u.

|    |           |           |           |
|----|-----------|-----------|-----------|
| 8  | 0.834757  | -0.639175 | -0.033437 |
| 8  | 3.140558  | -0.606010 | 1.663053  |
| 8  | 2.548502  | 1.439265  | -0.102865 |
| 8  | 3.412566  | -0.928974 | -1.236378 |
| 8  | -1.830509 | -1.857734 | 0.507565  |
| 8  | -1.525479 | 1.013468  | 1.478212  |
| 8  | -0.086377 | 2.390109  | -0.324599 |
| 1  | 3.558831  | 0.036555  | 2.245074  |
| 1  | 0.888090  | 2.324554  | -0.305932 |
| 1  | 3.978563  | -0.421738 | -1.827220 |
| 1  | -1.108962 | -2.447464 | 0.750191  |
| 1  | -1.758571 | 0.396313  | 2.181718  |
| 1  | -0.354240 | 2.571724  | 0.589640  |
| 23 | 2.468802  | -0.148447 | 0.069049  |
| 83 | -1.232130 | 0.012906  | -0.357220 |
| 8  | -3.854264 | -0.573050 | -0.439911 |
| 1  | -3.617946 | -1.395184 | 0.031973  |
| 1  | -4.568229 | -0.152636 | 0.050045  |

**B03 (doublet)**

E = -1555.80796978 a.u.

|    |           |           |           |
|----|-----------|-----------|-----------|
| 8  | 0.973839  | -0.645795 | -0.032600 |
| 8  | 3.344609  | -0.704982 | 1.575297  |
| 8  | 2.751719  | 1.376727  | -0.143116 |
| 8  | 3.499786  | -1.001854 | -1.329866 |
| 8  | -1.709406 | -1.792465 | 0.606380  |
| 8  | -1.249453 | 1.056776  | 1.604181  |
| 8  | 0.138781  | 2.387513  | -0.261013 |
| 1  | 3.788930  | -0.085577 | 2.163370  |
| 1  | 1.112282  | 2.304418  | -0.276795 |
| 1  | 4.052150  | -0.511312 | -1.947361 |
| 1  | -1.018716 | -2.404339 | 0.883012  |
| 1  | -0.092647 | 2.614237  | 0.653109  |
| 1  | -1.553062 | 0.467454  | 2.304646  |
| 23 | 2.631462  | -0.208399 | 0.015120  |
| 83 | -1.062773 | 0.077417  | -0.250438 |
| 8  | -3.841085 | -0.616241 | -0.181062 |
| 1  | -3.418183 | -1.384788 | 0.286820  |

**B04 (doublet)**

E = -1632.29170104 a.u.

|   |           |           |           |
|---|-----------|-----------|-----------|
| 8 | 0.997971  | -0.531663 | -0.075813 |
| 8 | 3.308437  | -0.924654 | 1.565978  |
| 8 | 2.996934  | 1.272850  | -0.088102 |
| 8 | 3.483129  | -1.139717 | -1.350209 |
| 8 | -1.752018 | -1.404794 | 0.377633  |
| 8 | -1.030820 | 1.336339  | 1.597333  |

|    |           |           |           |
|----|-----------|-----------|-----------|
| 8  | 0.547629  | 2.621357  | -0.146436 |
| 1  | 3.827597  | -0.383928 | 2.169890  |
| 1  | 1.500211  | 2.401314  | -0.177225 |
| 1  | 4.113151  | -0.696773 | -1.927855 |
| 1  | -1.051625 | -2.041032 | 0.565503  |
| 1  | 0.345796  | 2.776410  | 0.789480  |
| 1  | -1.374646 | 0.723469  | 2.257409  |
| 23 | 2.687868  | -0.293973 | 0.011581  |
| 83 | -0.940612 | 0.478992  | -0.326047 |
| 8  | -4.346453 | -1.614916 | 0.435009  |
| 1  | -3.344975 | -1.740846 | 0.466993  |
| 8  | -3.539766 | 0.847226  | -0.444405 |
| 1  | -3.975313 | 1.608487  | -0.046596 |
| 1  | -4.038748 | 0.043955  | -0.159852 |

**B05**

E = -1631.64226927 a.u.

|    |           |           |           |
|----|-----------|-----------|-----------|
| 8  | 0.814794  | -0.587696 | -0.125467 |
| 8  | 3.070179  | -1.312495 | 1.472661  |
| 8  | 2.900183  | 1.093712  | 0.092547  |
| 8  | 3.270829  | -1.186028 | -1.443536 |
| 8  | -1.565744 | -1.665918 | -0.220990 |
| 8  | -0.972376 | 1.024137  | 1.755838  |
| 8  | 0.624894  | 2.618242  | 0.220833  |
| 1  | 3.563631  | -0.874213 | 2.173238  |
| 1  | 1.552119  | 2.298589  | 0.142704  |
| 1  | 3.960622  | -0.730971 | -1.937433 |
| 1  | -0.895309 | -2.091652 | 0.338817  |
| 1  | 0.443151  | 2.654023  | 1.172943  |
| 1  | -1.880462 | 0.957927  | 2.082646  |
| 23 | 2.507928  | -0.460914 | 0.004553  |
| 83 | -1.011847 | 0.735044  | -0.310735 |
| 8  | -2.828342 | -2.011481 | 0.407504  |
| 8  | -3.202865 | 0.527254  | 0.144738  |
| 1  | -3.878295 | 0.831848  | -0.469225 |
| 1  | -3.236928 | -1.090658 | 0.402802  |

**B06 (doublet)**

E = -1631.01879319 a.u.

|   |           |           |           |
|---|-----------|-----------|-----------|
| 8 | 1.158247  | -0.767860 | -0.077369 |
| 8 | 3.481607  | -0.838747 | 1.600272  |
| 8 | 2.806435  | 1.351583  | 0.056122  |
| 8 | 3.735282  | -0.859839 | -1.315402 |
| 8 | -1.440153 | -2.207650 | 0.270331  |
| 8 | -1.127362 | 0.562967  | 1.680142  |
| 8 | 0.186768  | 2.259571  | 0.060115  |
| 1 | 3.890235  | -0.252882 | 2.245662  |
| 1 | 1.164999  | 2.195067  | 0.015839  |
| 1 | 4.284693  | -0.283914 | -1.857088 |
| 1 | -0.026345 | 2.321298  | 1.004579  |
| 1 | -1.206462 | -0.171354 | 2.300251  |

|    |           |           |           |
|----|-----------|-----------|-----------|
| 23 | 2.782037  | -0.250343 | 0.067127  |
| 83 | -0.882277 | -0.039341 | -0.321041 |
| 8  | -2.715381 | -2.516183 | 0.328140  |
| 8  | -3.447275 | -0.124118 | -0.361357 |
| 1  | -3.953969 | 0.391224  | 0.276277  |
| 1  | -3.508427 | -1.080603 | -0.082526 |

**B07 (triplet)**

E = -1630.39962992 a.u.

|    |           |           |           |
|----|-----------|-----------|-----------|
| 8  | -0.343105 | -0.046821 | -0.390359 |
| 8  | -2.251369 | 1.646870  | 0.912009  |
| 8  | -2.844878 | -0.928803 | 0.115165  |
| 8  | -2.573194 | 0.930235  | -1.902323 |
| 8  | 1.116174  | 3.835446  | 1.079715  |
| 8  | 1.032976  | -1.857003 | 1.927259  |
| 8  | -0.957509 | -2.991402 | 0.551592  |
| 1  | -2.862364 | 1.554777  | 1.650457  |
| 1  | -1.797303 | -2.508538 | 0.442922  |
| 1  | -3.338471 | 0.549986  | -2.346014 |
| 1  | -0.742650 | -2.938956 | 1.496204  |
| 1  | 1.633727  | -1.270888 | 2.403353  |
| 23 | -2.011015 | 0.363726  | -0.305343 |
| 83 | 1.153138  | -1.571681 | -0.160822 |
| 8  | 1.525080  | 3.149540  | 0.176961  |
| 8  | 2.657072  | -0.102687 | 0.036289  |
| 1  | 2.340301  | 0.807398  | 0.075656  |

**B08**

E = -1745.15562677 a.u.

|    |           |           |           |
|----|-----------|-----------|-----------|
| 8  | 0.990420  | -0.629602 | 0.021672  |
| 8  | 3.061779  | -0.512225 | 1.978242  |
| 8  | 2.881799  | 1.288425  | -0.111550 |
| 8  | 3.656922  | -1.273522 | -0.796328 |
| 8  | -1.757617 | -1.784831 | -0.092183 |
| 8  | -1.292385 | 0.995654  | 1.266792  |
| 8  | 0.372635  | 2.453288  | -0.618638 |
| 1  | 3.549675  | 0.141800  | 2.489186  |
| 1  | 1.332872  | 2.297854  | -0.529489 |
| 1  | 4.328581  | -0.902684 | -1.377871 |
| 1  | -1.097168 | -2.362302 | 0.308744  |
| 1  | -0.857036 | 0.495036  | 1.967642  |
| 1  | 0.084925  | 2.765908  | 0.248769  |
| 23 | 2.638550  | -0.248628 | 0.258148  |
| 83 | -0.970542 | 0.079970  | -0.678622 |
| 8  | -3.399607 | 0.805509  | -0.749046 |
| 8  | -3.792053 | 1.367789  | 1.402281  |
| 8  | -5.466802 | 1.221699  | 0.009448  |
| 1  | -2.773660 | 1.238563  | 1.471375  |
| 1  | -5.653278 | 1.000963  | -0.913287 |
| 6  | -4.151514 | 1.111241  | 0.186568  |

**B09 (doublet)**

E = -1744.46075242 a.u.

|    |           |           |           |
|----|-----------|-----------|-----------|
| 8  | 1.552544  | -0.565547 | 0.387475  |
| 8  | 3.609790  | 0.850402  | 1.779422  |
| 8  | 2.974101  | 1.343885  | -0.869031 |
| 8  | 4.269257  | -1.045952 | -0.357294 |
| 8  | -1.000048 | -1.763619 | 1.349843  |
| 8  | -0.928225 | 1.220925  | 0.854463  |
| 8  | 0.300234  | 1.604650  | -1.613249 |
| 1  | 3.895332  | 1.764965  | 1.873098  |
| 1  | 1.274014  | 1.676668  | -1.537506 |
| 1  | 4.839754  | -0.887997 | -1.116535 |
| 1  | -0.210505 | -2.019942 | 1.842132  |
| 1  | -0.988080 | 1.005339  | 1.798177  |
| 1  | -0.049001 | 2.333702  | -1.084463 |
| 23 | 3.084701  | 0.167785  | 0.211866  |
| 83 | -0.532233 | -0.602026 | -0.345833 |
| 8  | -2.938148 | -0.235803 | -0.526771 |
| 8  | -3.059330 | 1.406564  | 1.020931  |
| 8  | -4.899768 | 0.586233  | 0.178911  |
| 1  | -5.182806 | -0.102090 | -0.439612 |
| 6  | -3.559015 | 0.561024  | 0.207497  |

**B10 (doublet)**

E = -2009.58391896 a.u.

|    |           |           |           |
|----|-----------|-----------|-----------|
| 8  | 1.357192  | -0.239476 | 0.464543  |
| 8  | 3.668965  | 0.808373  | 1.795285  |
| 8  | 3.259573  | 1.044124  | -0.933257 |
| 8  | 3.902434  | -1.473278 | 0.012501  |
| 8  | -1.109072 | -0.764677 | 1.705149  |
| 8  | -0.674552 | 2.111375  | 0.422252  |
| 8  | 0.757861  | 1.739170  | -1.820406 |
| 1  | 4.059210  | 1.687888  | 1.838667  |
| 1  | 1.729991  | 1.619944  | -1.733669 |
| 1  | 4.479167  | -1.632199 | -0.742420 |
| 1  | -0.299213 | -0.831350 | 2.229914  |
| 1  | -1.542259 | 2.341448  | 0.800755  |
| 1  | 0.538845  | 2.558465  | -1.343772 |
| 23 | 3.049090  | 0.058562  | 0.307865  |
| 83 | -0.561004 | 0.214709  | -0.426454 |
| 8  | -3.293535 | 0.541602  | -0.314534 |
| 8  | -3.486093 | 2.159522  | 1.211146  |
| 8  | -4.891148 | 0.425180  | 1.310116  |
| 1  | -4.948952 | -0.481806 | 0.941064  |
| 6  | -3.885476 | 1.112755  | 0.783326  |
| 8  | -2.136070 | -2.267155 | -0.785281 |
| 8  | -2.706761 | -2.926235 | 1.159590  |
| 8  | -4.228294 | -1.892703 | -0.117313 |
| 1  | -1.578093 | -1.632567 | 1.734699  |
| 1  | -3.736997 | -0.317789 | -0.546757 |
| 6  | -3.082624 | -2.376702 | 0.066612  |

**B11**

E = -2008.91006596 a.u.

|    |           |           |           |
|----|-----------|-----------|-----------|
| 8  | 2.025984  | -0.412982 | 0.285631  |
| 8  | 4.171521  | 0.209494  | 2.089173  |
| 8  | 4.108671  | 1.077514  | -0.533310 |
| 8  | 4.595036  | -1.610493 | -0.133114 |
| 8  | -0.642300 | -1.161796 | 0.923563  |
| 8  | 0.053533  | 1.994249  | 0.544417  |
| 8  | 1.733572  | 2.028012  | -1.547706 |
| 1  | 4.556341  | 1.040326  | 2.388654  |
| 1  | 2.687639  | 1.865583  | -1.379644 |
| 1  | 5.273787  | -1.613573 | -0.816760 |
| 1  | -0.064212 | -1.515663 | 1.609630  |
| 1  | -0.834407 | 2.107235  | 0.932212  |
| 1  | 1.474740  | 2.761002  | -0.964326 |
| 23 | 3.732070  | -0.155265 | 0.409592  |
| 83 | 0.237014  | 0.302204  | -0.637182 |
| 8  | -2.593461 | 0.532396  | -0.717578 |
| 8  | -2.735522 | 1.802209  | 1.133647  |
| 8  | -4.282478 | 0.244684  | 0.773941  |
| 6  | -3.176167 | 0.921833  | 0.446889  |
| 8  | -4.316061 | -3.091696 | -0.334993 |
| 8  | -2.980083 | -2.029328 | 1.182792  |
| 8  | -4.535544 | -0.856620 | -0.151623 |
| 1  | -1.604448 | -1.511454 | 1.033881  |
| 1  | -3.209960 | -0.142573 | -1.095660 |
| 6  | -3.843702 | -2.211645 | 0.319663  |

**B12 (doublet)**

E = -2008.29632626 a.u.

|    |           |           |           |
|----|-----------|-----------|-----------|
| 8  | -1.795833 | 0.702544  | 0.200946  |
| 8  | -3.985371 | 0.869715  | 2.036987  |
| 8  | -4.051787 | -0.683077 | -0.261361 |
| 8  | -4.166114 | 2.063822  | -0.616648 |
| 8  | 0.740461  | 1.508512  | 0.455838  |
| 8  | -0.184323 | -1.732070 | 1.169307  |
| 8  | -1.878117 | -2.235035 | -0.887611 |
| 1  | -4.491003 | 0.204815  | 2.515869  |
| 1  | -2.786396 | -1.868341 | -0.801383 |
| 1  | -4.876321 | 1.955025  | -1.257817 |
| 1  | 0.105425  | 2.009419  | 0.983017  |
| 1  | 0.708782  | -1.966477 | 1.492623  |
| 1  | -1.719405 | -2.743393 | -0.075181 |
| 23 | -3.503352 | 0.701360  | 0.328967  |
| 83 | -0.102625 | -0.523960 | -0.514668 |
| 8  | 2.287732  | -0.691894 | -0.331739 |
| 8  | 2.602300  | -2.094500 | 1.419986  |
| 8  | 4.405686  | -1.229357 | 0.420513  |
| 6  | 2.933921  | -1.355241 | 0.518274  |
| 8  | 5.338696  | 2.789259  | -0.524984 |

|   |          |           |           |
|---|----------|-----------|-----------|
| 8 | 3.508934 | 2.333476  | 0.827778  |
| 8 | 4.836047 | -0.301278 | -0.405338 |
| 1 | 1.654382 | 1.706374  | 0.715046  |
| 6 | 4.428962 | 2.543039  | 0.141683  |

**B13 (doublet)**

E = -1819.65095204 a.u.

|    |           |           |           |
|----|-----------|-----------|-----------|
| 8  | -1.867457 | 0.756444  | 0.212984  |
| 8  | -4.151582 | 0.937040  | 1.930040  |
| 8  | -4.130555 | -0.551590 | -0.407383 |
| 8  | -4.155986 | 2.201279  | -0.698840 |
| 8  | 0.794147  | 1.342185  | 0.738685  |
| 8  | -0.352080 | -1.733945 | 1.212843  |
| 8  | -1.946605 | -2.119225 | -0.963149 |
| 1  | -4.720639 | 0.285020  | 2.352079  |
| 1  | -2.851666 | -1.738789 | -0.908664 |
| 1  | -4.824948 | 2.127654  | -1.387639 |
| 1  | 0.245963  | 1.810415  | 1.378957  |
| 1  | 0.497910  | -1.970265 | 1.603367  |
| 1  | -1.854110 | -2.695363 | -0.188490 |
| 23 | -3.579787 | 0.802442  | 0.247126  |
| 83 | -0.155404 | -0.451106 | -0.426743 |
| 8  | 2.206744  | -1.013440 | -0.159700 |
| 8  | 3.179934  | 0.549672  | 1.150838  |
| 8  | 4.445622  | -1.103121 | 0.375990  |
| 6  | 3.142613  | -0.464361 | 0.456950  |
| 8  | 4.475219  | -2.204727 | -0.348675 |
| 1  | 1.745247  | 1.192323  | 1.058273  |

**B14 (triplet)**

E = -1819.05354668 a.u.

|    |           |           |           |
|----|-----------|-----------|-----------|
| 8  | 1.521548  | -0.798058 | 0.049582  |
| 8  | 3.956257  | -0.724440 | 1.560815  |
| 8  | 3.299602  | 1.199569  | -0.306740 |
| 8  | 3.997298  | -1.273644 | -1.309951 |
| 8  | -1.143593 | -1.891457 | 0.895766  |
| 8  | -0.658482 | 1.031727  | 1.606944  |
| 8  | 0.662217  | 2.193989  | -0.407425 |
| 1  | 4.420318  | -0.057328 | 2.077128  |
| 1  | 1.634007  | 2.123426  | -0.455814 |
| 1  | 4.520481  | -0.840912 | -1.992664 |
| 1  | -0.426068 | -2.419621 | 1.263136  |
| 1  | -0.922318 | 0.509447  | 2.373810  |
| 1  | 0.461543  | 2.469226  | 0.500895  |
| 23 | 3.182624  | -0.363368 | -0.006951 |
| 83 | -0.523818 | -0.142000 | -0.140633 |
| 8  | -3.516141 | -1.039198 | -0.317677 |
| 8  | -4.074915 | -2.971287 | 0.842251  |
| 8  | -2.868798 | 2.574535  | -1.063112 |
| 6  | -3.765299 | -2.012859 | 0.275466  |
| 8  | -2.862578 | 3.723295  | -0.698830 |



**B15**

E = -1821.63640703 a.u.

|    |           |           |           |
|----|-----------|-----------|-----------|
| 8  | 1.144153  | -0.632834 | 0.131515  |
| 8  | 3.565402  | -0.247438 | 1.603777  |
| 8  | 2.728608  | 1.479975  | -0.392721 |
| 8  | 3.629942  | -0.998612 | -1.228724 |
| 8  | -1.302010 | -1.930975 | 0.894187  |
| 8  | -1.124621 | 1.074244  | 1.621201  |
| 8  | 0.069373  | 2.323324  | -0.451295 |
| 1  | 4.009185  | 0.486963  | 2.040021  |
| 1  | 1.043252  | 2.274998  | -0.537023 |
| 1  | 4.130377  | -0.566895 | -1.928699 |
| 1  | -0.443957 | -2.333262 | 1.083042  |
| 1  | -1.158884 | 0.512043  | 2.403999  |
| 1  | -0.096601 | 2.598447  | 0.463657  |
| 23 | 2.750817  | -0.066511 | 0.021070  |
| 83 | -0.972108 | -0.052781 | -0.156180 |
| 8  | -3.495663 | 0.019879  | 0.073515  |
| 1  | -3.968508 | -0.836330 | 0.236273  |
| 1  | -3.753861 | 0.621182  | 0.781740  |
| 8  | -4.711169 | -2.305407 | 0.548114  |
| 8  | -3.088354 | -3.682925 | 1.325498  |
| 8  | -5.147492 | -4.384316 | 1.263427  |
| 1  | -2.421039 | -2.928287 | 1.130903  |
| 1  | -6.030987 | -4.086357 | 1.009776  |
| 6  | -4.307453 | -3.368679 | 1.013711  |

**B16 (doublet)**

E = -1820.93872419 a.u.

|    |           |           |           |
|----|-----------|-----------|-----------|
| 8  | -1.036504 | 0.851491  | 0.256178  |
| 8  | -3.461883 | 1.689202  | 1.516368  |
| 8  | -3.391601 | -0.202782 | -0.506009 |
| 8  | -2.891217 | 2.411771  | -1.262207 |
| 8  | 1.596236  | 0.705409  | 1.452779  |
| 8  | -0.104955 | -1.770995 | 1.851973  |
| 8  | -1.515776 | -2.242081 | -0.386568 |
| 1  | -4.246526 | 1.263283  | 1.876325  |
| 1  | -2.324140 | -1.710793 | -0.547484 |
| 1  | -3.450462 | 2.287745  | -2.035937 |
| 1  | 1.175380  | 1.578303  | 1.385034  |
| 1  | 0.105740  | -1.323835 | 2.678860  |
| 1  | -1.604251 | -2.586076 | 0.516587  |
| 23 | -2.696686 | 1.152569  | -0.008764 |
| 83 | 0.496108  | -0.735049 | 0.110697  |
| 8  | 2.703646  | -1.891097 | 0.568972  |
| 1  | 3.424298  | -1.207635 | 0.520939  |
| 1  | 2.773308  | -2.340837 | 1.418067  |
| 8  | 4.322411  | 0.158206  | 0.121525  |
| 8  | 2.411646  | 1.202049  | -0.504680 |
| 8  | 4.336535  | 1.974568  | -1.200327 |
| 1  | 5.275280  | 1.739901  | -1.194884 |

|   |          |          |           |
|---|----------|----------|-----------|
| 6 | 3.698253 | 1.039513 | -0.465730 |
|---|----------|----------|-----------|

**B17**

E = -1820.29339127 a.u.

|    |           |           |           |
|----|-----------|-----------|-----------|
| 8  | -1.335446 | 0.778781  | 0.126212  |
| 8  | -3.772999 | 1.005359  | 1.616573  |
| 8  | -3.537327 | -0.542377 | -0.664603 |
| 8  | -3.520120 | 2.196858  | -1.048275 |
| 8  | 1.686115  | 0.552258  | 1.149355  |
| 8  | 0.120514  | -1.824073 | 1.234154  |
| 8  | -1.360024 | -2.222587 | -0.978002 |
| 1  | -4.432065 | 0.390501  | 1.954331  |
| 1  | -2.248461 | -1.805844 | -1.007734 |
| 1  | -4.137290 | 2.085568  | -1.778707 |
| 1  | 0.378984  | -1.450332 | 2.086052  |
| 1  | -1.335297 | -2.717079 | -0.144276 |
| 23 | -3.035819 | 0.829046  | -0.001821 |
| 83 | 0.405731  | -0.471547 | -0.345097 |
| 8  | 2.675688  | -1.786319 | -0.509012 |
| 1  | 3.317104  | -1.107629 | -0.211107 |
| 1  | 2.697352  | -2.490617 | 0.149355  |
| 8  | 4.088060  | 0.542858  | 0.052396  |
| 8  | 2.263951  | 1.781491  | 0.667599  |
| 8  | 4.067246  | 2.801715  | 0.065645  |
| 1  | 4.956021  | 2.658323  | -0.287026 |
| 6  | 3.521491  | 1.594533  | 0.255172  |

**B18 (doublet)**

E = -1819.60181600 a.u.

|    |           |           |           |
|----|-----------|-----------|-----------|
| 8  | -1.094199 | 0.536690  | -0.123782 |
| 8  | -3.169322 | 1.558715  | 1.565419  |
| 8  | -3.568281 | -0.498570 | -0.246456 |
| 8  | -3.212723 | 2.027541  | -1.323984 |
| 8  | 1.836478  | 0.259348  | 0.641203  |
| 8  | 0.062514  | -2.003979 | 1.428797  |
| 8  | -1.775363 | -2.562512 | -0.423413 |
| 1  | -3.828113 | 1.164858  | 2.146268  |
| 1  | -2.579684 | -1.994483 | -0.424537 |
| 1  | -3.956529 | 1.869320  | -1.914387 |
| 1  | 0.714464  | -1.739187 | 2.087721  |
| 1  | -1.699817 | -2.909492 | 0.479091  |
| 23 | -2.762197 | 0.873865  | -0.033783 |
| 83 | 0.305785  | -1.137261 | -0.462612 |
| 8  | 2.626069  | -1.511884 | -0.473799 |
| 1  | 3.239484  | -1.577307 | 0.271171  |
| 8  | 4.250572  | 1.173369  | 0.879893  |
| 8  | 2.182262  | 1.381615  | -0.098608 |
| 8  | 3.695529  | 2.849306  | -0.553423 |
| 1  | 4.608478  | 3.124128  | -0.392117 |
| 6  | 3.484066  | 1.741504  | 0.165709  |

**B19 (triplet)**

E = -1819.05411427 a.u.

|    |           |           |           |
|----|-----------|-----------|-----------|
| 8  | -1.091192 | 0.451874  | 0.426741  |
| 8  | -3.550236 | 0.536272  | 1.899009  |
| 8  | -3.336420 | -0.653735 | -0.583707 |
| 8  | -3.214793 | 2.102226  | -0.548307 |
| 8  | 0.879727  | 2.561726  | -1.594403 |
| 8  | 0.378596  | -2.364684 | 1.028264  |
| 8  | -1.096871 | -2.252098 | -1.202835 |
| 1  | -4.220468 | -0.109614 | 2.145198  |
| 1  | -2.005029 | -1.898487 | -1.160799 |
| 1  | -3.795275 | 2.127456  | -1.316118 |
| 1  | 0.745782  | -2.280871 | 1.916069  |
| 1  | -1.031639 | -2.903704 | -0.487225 |
| 23 | -2.798034 | 0.574827  | 0.280541  |
| 83 | 0.683955  | -0.635659 | -0.138293 |
| 8  | 1.739472  | 0.341189  | 1.427195  |
| 1  | 1.190185  | 0.851970  | 2.032046  |
| 8  | 4.865881  | 0.402264  | 1.567725  |
| 8  | 0.724236  | 3.631498  | -1.062083 |
| 8  | 3.789594  | -0.684682 | -0.178916 |
| 6  | 4.301214  | -0.130403 | 0.711752  |

**B20**

E = -1743.82017670 a.u.

|    |           |           |           |
|----|-----------|-----------|-----------|
| 8  | 1.404659  | -0.516592 | 0.201360  |
| 8  | 3.212814  | 0.893233  | 1.921466  |
| 8  | 2.950394  | 1.458902  | -0.772265 |
| 8  | 4.216490  | -0.915732 | -0.141246 |
| 8  | -1.214070 | -1.595825 | 1.077635  |
| 8  | -1.210557 | 1.379340  | 0.081982  |
| 8  | 0.433640  | 1.471596  | -1.966871 |
| 1  | 3.357711  | 1.828142  | 2.099851  |
| 1  | 1.365774  | 1.641762  | -1.722347 |
| 1  | 4.877863  | -0.733368 | -0.816760 |
| 1  | -0.519910 | -1.630110 | 1.746929  |
| 1  | -0.073036 | 2.216173  | -1.614213 |
| 23 | 2.932986  | 0.254478  | 0.278604  |
| 83 | -0.584730 | -0.608277 | -0.670913 |
| 8  | -3.126911 | -0.228215 | -0.610495 |
| 8  | -2.427280 | 1.360867  | 0.843644  |
| 8  | -4.478732 | 0.675380  | 0.961287  |
| 1  | -5.079403 | -0.004442 | 0.625449  |
| 6  | -3.325908 | 0.540708  | 0.318565  |

**B21**

E = -1820.29530816 a.u.

|   |          |           |           |
|---|----------|-----------|-----------|
| 8 | 1.530485 | -0.282229 | 0.544131  |
| 8 | 2.882181 | 2.093322  | 1.404276  |
| 8 | 3.097426 | 1.088432  | -1.164415 |
| 8 | 4.374289 | -0.352599 | 0.819646  |

|    |           |           |           |
|----|-----------|-----------|-----------|
| 8  | -1.085176 | -1.427871 | 1.381711  |
| 8  | -1.193138 | 0.733589  | -0.936464 |
| 8  | 0.865208  | 0.185858  | -2.582205 |
| 1  | 2.943413  | 2.988311  | 1.055133  |
| 1  | 1.729650  | 0.558676  | -2.313965 |
| 1  | 5.143221  | -0.439326 | 0.246806  |
| 1  | -0.571936 | -1.063273 | 2.112370  |
| 1  | 0.271365  | 0.947434  | -2.638497 |
| 23 | 2.959574  | 0.642789  | 0.365816  |
| 83 | -0.174710 | -1.164821 | -0.507415 |
| 8  | -3.764033 | 0.396511  | -0.393603 |
| 8  | -1.783658 | 1.394677  | 0.185160  |
| 8  | -3.584197 | 1.985017  | 1.204388  |
| 1  | -4.526622 | 1.788766  | 1.293274  |
| 6  | -3.103655 | 1.172629  | 0.256191  |
| 8  | -2.570801 | -2.062914 | -0.824655 |
| 1  | -3.114767 | -1.253995 | -0.917796 |
| 1  | -2.737090 | -2.347651 | 0.086420  |

**B22 (doublet)**

E = -1819.59904923 a.u.

|    |           |           |           |
|----|-----------|-----------|-----------|
| 8  | -1.488654 | -0.093228 | -0.873835 |
| 8  | -2.706145 | 2.468560  | -0.460998 |
| 8  | -2.670403 | 0.491462  | 1.473531  |
| 8  | -4.338309 | 0.056846  | -0.690575 |
| 8  | 1.289560  | -0.487205 | -2.187823 |
| 8  | 1.037128  | 0.607316  | 0.696802  |
| 8  | -0.564104 | -1.228979 | 1.974853  |
| 1  | -2.606296 | 3.132792  | 0.228625  |
| 1  | -1.314771 | -0.604396 | 2.063348  |
| 1  | -5.024267 | -0.251668 | -0.089574 |
| 1  | 0.861043  | 0.283656  | -2.578435 |
| 1  | 0.122973  | -0.934716 | 2.585614  |
| 23 | -2.785393 | 0.720611  | -0.106255 |
| 83 | 0.329296  | -1.246047 | -0.479032 |
| 8  | 3.611419  | 1.171479  | 0.409357  |
| 8  | 1.447306  | 1.637288  | -0.181120 |
| 8  | 3.012893  | 2.954056  | -0.853252 |
| 1  | 3.971590  | 3.075703  | -0.893173 |
| 6  | 2.783965  | 1.849193  | -0.140886 |
| 8  | 2.303375  | -1.261764 | 0.853059  |
| 1  | 3.023676  | -0.607336 | 0.739998  |

**B23 (triplet)**

E = -1819.05326386 a.u.

|   |           |           |           |
|---|-----------|-----------|-----------|
| 8 | -1.388299 | -0.112421 | 0.196039  |
| 8 | -3.329079 | 1.046827  | -1.569311 |
| 8 | -2.245578 | 2.417633  | 0.568301  |
| 8 | -4.022276 | 0.402899  | 1.194242  |
| 8 | 0.670612  | -2.269325 | -0.268429 |
| 8 | 3.869821  | -3.244481 | 0.972613  |

|    |           |           |           |
|----|-----------|-----------|-----------|
| 8  | 0.498812  | 2.204767  | 1.125923  |
| 1  | -3.397265 | 1.872199  | -2.060295 |
| 1  | -0.415751 | 2.530093  | 1.021602  |
| 1  | -4.421980 | 0.971862  | 1.860292  |
| 1  | -0.154632 | -2.490439 | -0.714700 |
| 1  | 1.032078  | 2.693212  | 0.481326  |
| 23 | -2.722826 | 0.966297  | 0.106948  |
| 83 | 0.690589  | -0.379571 | 0.684821  |
| 8  | 3.011486  | 2.334181  | -2.900228 |
| 8  | 3.485632  | -2.205487 | 1.445650  |
| 8  | 2.229411  | 3.417017  | -1.002083 |
| 6  | 2.607782  | 2.842321  | -1.942306 |
| 8  | 1.566660  | 0.509276  | -1.016116 |
| 1  | 1.668531  | -0.166805 | -1.699213 |

## References

S1 Chapter 16.2, Handbook of Chemistry: Pure Chemistry, 6th ed. Maruzen Publishing, Tokyo, Japan, 2021.
